1 **Expression of GRINA Correlates with Prognosis in Human Cancers: A Pan-cancer**

2 **Analysis**

3 **S. M. Riazul Islam**<sup>1, †</sup>, **Subbroto Kumar Saha**<sup>2, 3, †, \*</sup>, **Shaker El-Sappagh**<sup>4</sup>, **Faisal**

4 **Tariq**<sup>5</sup>, **Joydeep Das**<sup>6</sup>, **Muhammad Afzal**<sup>7</sup>, and **Ssang-Goo Cho**<sup>2, \*</sup>

5 <sup>1</sup> Department of Computer Science and Engineering, Sejong University, 209 Neungdong-  
6 ro, Gwangjin-gu, Seoul, 05006, Republic of Korea; riaz@sejong.ac.kr (S.M.R.I)

7 <sup>2</sup> Department of Stem Cell and Regenerative Biotechnology, Konkuk University, 120  
8 Neungdong-Ro, Seoul 05029, Republic of Korea; subbroto@konkuk.ac.kr (S.K.S.).

9 <sup>3</sup> Department of Biochemistry and Molecular Medicine, University of California at Davis,  
10 School of Medicine, Sacramento, California 95817, USA

11 <sup>4</sup> Centro Singular de Investigación en Tecnoloxías Intelixentes (CiTIUS), Universidade de  
12 Santiago de Compostela, 15782, Santiago de Compostela, Spain;  
13 shaker.elsappagh@usc.es (S.E.S.)

14 <sup>5</sup> James Watt School of Engineering, University of Glasgow, Glasgow G12 8QQ, United  
15 Kingdom; faisal.tariq@glasgow.ac.uk (F.T.)

16 <sup>6</sup> School of Chemistry, Shoolini University of Biotechnology and Management Sciences,  
17 Bajhol, Sultanpur, Solan – 173229 (HP), India; jdchem83@gmail.com (J.D.)

18 <sup>7</sup> Department of Software, Sejong University, Seoul 05006, South Korea;  
19 mafzal@sejong.ac.kr (M.A.)

20 † These authors contributed equally to this work: S.M.R. Islam and S.K. Saha (co-first  
21 authors)

22 \* Correspondence: sksaha@ucdavis.edu (S.K.S.); ssangoo@konkuk.ac.kr (S.-G.C.); Tel.:  
23 +1 (410) 413-0532 (S.K.S.); Tel.: +82-2-450-4207 (S.-G.C.); Fax: +82-2-444-4207 (S.-  
24 G.C.)

25 **Abstract:** *GRINA* is an emerging target for cancer therapy. However, the role  
26 of *GRINA* expression and its correlation with cancer patient survival has not been  
27 comprehensively studied. Here, we found that mRNA and protein expression of *GRINA*  
28 was upregulated in breast, colon, gastric, and prostate cancers and negatively correlated with  
29 patient survival. Also, the upregulation of *GRINA* expression is associated with  
30 hypomethylation of its promoter region. Our *GRINA*-miRNAs network analysis revealed  
31 potential regulatory miRNAs regulating the *GRINA* expression and its downstream  
32 pathways. Next, functional enrichment and pathway analysis of genes commonly co-express  
33 with *GRINA* in breast, colon, gastric, and prostate cancers revealed *GRINA* regulatory  
34 pathways. Concurrently, our upstream regulator analysis revealed possible kinases,  
35 transcription factors, and proteins that may potentially regulate *GRINA* . Overall, this study  
36 demonstrates the prognostic significance of *GRINA* expression and identifies potential  
37 regulatory mechanisms, which might have significant implications in targeted therapies for  
38 human cancers.

39 **Keywords:** glutamate receptor; *GRINA*; cancer biomarker; multiomics; cancer survival

40

41

42

43

44

45

46

47

48

## 49 **1. Introduction**

50 Targeted therapy is an emerging paradigm in molecular medicine for next-generation  
51 cancer treatment. Recently, targeting the N-methyl-D-aspartate (NMDA) receptor expressed  
52 on the surfaces of cancer cells has emerged as a therapeutic approach [1]. NMDA receptors  
53 regulate the mammalian target of rapamycin (mTOR), a kinase involved in signaling that is  
54 a therapeutic target for many types of cancers [2-4]. Triggering the inappropriate expression  
55 of NMDA receptors on cancer cell lines thus represents a possible therapeutic avenue to  
56 control dysregulated cancer cell growth, division, and invasiveness [5, 6]. For example,  
57 NMDA receptors have been closely associated with tumor progression [7]. Inactivation of  
58 NMDA receptors in breast and lung cancers can potentially trigger apoptosis of tumor cells,  
59 and the NMDA receptor is a prospective therapeutic marker for ovarian cancer [8]. Also,  
60 NMDA2B phosphorylation can inhibit epileptic seizures triggered by brain tumors [9]. An  
61 essential constituent of NMDA heteromers in the NR2A subunit, the loss of which in gastric  
62 cancers can cause cell cycle arrest and prevent the proliferation of MKN45 [10].

63 One of the most common receptors belonging to the NMDA receptor family is GRINA,  
64 also known as transmembrane BAX inhibitor motif-containing (TMBIM3). GRINA, like  
65 other TMBIM members, is a regulator of cell death. All TMBIM family members inhibit  
66 different aspects of apoptosis, including ER modulation, calcium homeostasis, and ER stress  
67 signaling [11]. ER stress has also been shown to trigger TMBIM3/*GRINA* expression in  
68 defense against ER stress-triggered apoptosis [12]. GRINA also plays significant roles in cell  
69 proliferation, invasion, and migration [13], is strongly expressed in the central nervous

70 system [14], and is overexpressed in breast cancer tissue [15]. Besides, *GRINA* mRNA is  
71 significantly upregulated in the prefrontal cortex of human subjects with a depressive  
72 disorder [16]. These findings suggest that *GRINA* may play a significant role in the  
73 progression of multiple cancers.

74 The existence of the volume of research on TMBIM members and their dysregulation in  
75 various cancer types [17-19] implies that the *GRINA* gene could be useful in finding  
76 innovative approaches for specific cancer therapies. *GRINA* mRNA levels as diagnostic  
77 markers in cancers can be considered an emerging area of research [11, 13, 14]. However, to  
78 the best of our knowledge, this gene has not been studied from a data mining perspective yet.  
79 In this study, we use multi-omics analysis to systematically evaluate the biomarker  
80 importance and prognostic significance of *GRINA* for multiple cancers. *GRINA* expression  
81 patterns and clinical outcomes of certain cancers were compared using expression, function,  
82 and patient survival datasets accessible online. We also investigated several regulatory  
83 mechanisms that may underlie *GRINA* function in our cancers of interest by probing for  
84 miRNA-mRNA interactions, co-expressed proteins, pathway activity, and interactions  
85 between kinases and transcription factors. This bioinformatics analysis ultimately  
86 demonstrated that *GRINA* expression could be used as a biomarker for determining prognoses  
87 for patients with certain types of cancers.

## 88 **2. Experimental Section**

89 2.1. *GRINA* mRNA and Protein Expression, Promoter Methylation, and Copy Number  
90 Alterations (CNAs) Analysis

91 The OncoPrint platform (<https://www.oncoPrint.org/resource/login.html>) was used to  
92 analyze and visualize the *GRINA* mRNA expression [20-23]. Default threshold parameters  
93 were selected, consisting of  $p$ -value = 1E-4, fold-change = 2, and gene ranking in the top  
94 10%. Statistical analyses were performed using an unpaired  $t$ -test, and  $p < 0.05$  was  
95 considered significant.

96 *GRINA* mRNA expression in various types of cancer and normal tissues was examined  
97 using TCGA level 3 RNA-seq datasets via UCSC Xena (<https://xenabrowser.net/heatmap/>)  
98 [24]. Statistical analyses were performed using a Welch's  $t$ -test, and  $p < 0.05$  was considered  
99 significant.

100 *GRINA* mRNA expression in subclasses of multiple cancers, including breast, colon,  
101 gastric, and prostate cancers, was also determined using TCGA level 3 RNA-seq datasets via  
102 ULCAN (<http://ualcan.path.uab.edu/index.html>) [25]. Methylation values of *GRINA* gene  
103 promoter in cancers, such as breast, colon, gastric, and prostate cancer, were examined using  
104 TCGA datasets via ULCAN. Statistical analyses were performed using a student's  $t$ -test, and  
105  $p < 0.05$  was considered significant.

106 *GRINA* mRNA expression in various cancer cell lines was analyzed by RT-PCR. For  
107 RT-PCR analysis, total RNA was extracted from used cell lines using the Easy-Blue RNA  
108 Extraction kit (iNtRON Biotechnology, Seongnam-si, Gyeonggi-do, Korea). According to  
109 the manufacturer's instructions, total RNA (2  $\mu$ g) was reverse transcribed into cDNA using a  
110 cDNA synthesis kit (Promega, Madison, WI, USA). The RT-PCR was assessed using r-Taq  
111 plus Master Mix (Elpis Biotech, Daejeon, Korea), and the PCR products were analyzed by

112 ~1.5% agarose gel electrophoresis. The bands were separated in agarose gels containing  
113 ethidium bromide (EtBr) and observed under UV light. The pictures were analyzed in  
114 Photoshop CS6 (Version 13.0.6 x64, San Jose, CA, USA), and the relative expression fold  
115 changes were measured in ImageJ [26]. The primers were used as Forward primer 5'-  
116 ATTCTCTGCATCTTCATCCGG-3'; Reverse primer 5'-  
117 AAACACATACTCTTCTGGGCTC-3' for *GRINA* and Forward primer 5'-  
118 AATCCCATCACCATCTTCCAG-3'; Reverse primer 5'-  
119 CACGATACCAAAGTTGTCATGG-3' for *GAPDH*.

120 *GRINA* protein expression in cancerous and normal tissues was examined using  
121 immunohistochemistry (IHC) staining data from the Human Protein Atlas  
122 (<https://www.proteinatlas.org/>) [27, 28]. For IHC staining, the HPA036980 antibody  
123 targeting *GRINA* was used.

124 Copy number alterations (CNAs) of *GRINA* in various types of cancer were examined  
125 using TCGA datasets via cBioPortal (<https://www.cbioportal.org/>) [29, 30].

## 126 2.2. Prognosis Analysis Using R2: Kaplan Meier Scanner (Pro) and SurvExpress

127 The prognostic relationship between *GRINA* levels and cancer patient survival was  
128 investigated using the R2: Kaplan Meier Scanner web ([https://hgserver1.amc.nl/cgi-](https://hgserver1.amc.nl/cgi-bin/r2/main.cgi)  
129 [bin/r2/main.cgi](https://hgserver1.amc.nl/cgi-bin/r2/main.cgi)) [31] and using SurvExpress web  
130 (<http://bioinformatica.mty.itesm.mx:8080/Biomatec/SurvivaX.jsp>) [32]. Survival curve

131 analysis was conducted using a threshold log-rank test using scan modulus of expression value.

132 Statistical significance was indicated by  $p < 0.05$ .

### 133 2.3. Construction of the GRINA-miRNA-mRNA Regulatory Network

134 miRNAs targeting *GRINA* mRNA were predicted and retrieved from miRSystem

135 (<http://mirsystem.cgm.ntu.edu.tw/index.php>) [33] and starBase v3.0

136 (<http://starbase.sysu.edu.cn/>)[34]. Retrieved miRNAs were visualized as a Venn diagram

137 using Venny v1.2 (<https://bioinfogp.cnb.csic.es/tools/venny/>) [35]. The *GRINA*-miRNA-

138 mRNA regulatory network was constructed using starBase v3.0 to identify potential *GRINA*-

139 binding miRNAs. Expression levels of these miRNAs in breast cancer were also determined

140 using starBase v3.0 (<http://starbase.sysu.edu.cn/>). A Student's t-test was performed to

141 generate a  $p$ -value, which indicates the significance of an observation.  $p < 0.05$  was

142 considered statistically significant. The binding site of *GRINA* 3'UTR and miRNAs were

143 derived from Starbase v3.0 web.

### 144 2.4. Gene Ontology (GO) and Pathway Analysis of *GRINA* Co-expressed Genes

145 Genes positively and negatively co-expressed with *GRINA* in selected cancers were

146 retrieved from the TCGA data using R2: Genomics Analysis and Visualization Platform

147 (<https://hgserver1.amc.nl/cgi-bin/r2/main.cgi?&species=hs>) [31]. Positively and negatively

148 co-expressed genes were considered as those with  $r$  value  $-0.30 >$  and  $> 0.30$  and  $P \leq 0.01$ .

149 Genes showing co-expression with *GRINA* in breast, colon, stomach, and prostate cancers

150 were assembled into a Venn diagram via InteractiVenn

151 (<http://www.interactivenn.net/index.html>) to identify the common positively and negatively  
152 co-expressed genes of *GRINA* [36]. The common genes co-expressed with *GRINA* in breast,  
153 colon, stomach, and prostate cancers were then used to analyze gene ontology and pathway  
154 enrichment using Enrichr (<https://amp.pharm.mssm.edu/Enrichr/>) [37, 38]. The bar graphs  
155 retrieved from Enrichr web were ranked by *p*-value from several databases, including the  
156 Kyoto Encyclopedia of Genes and Genomes (KEGG)-2019, Reactome pathway-2016, and  
157 GO (biological process, molecular function, and cellular component)-2018.

## 158 2.5. Transcription Factors and Protein Kinases Associated with Genes Co-expressed with 159 *GRINA*

160 Upstream regulators and protein kinases associated with genes co-expressed with  
161 *GRINA* were identified by submitting the list of co-expressed genes to Expression2Kinases  
162 (X2K) web interface (<https://amp.pharm.mssm.edu/X2K/>) [39, 40], which identifies enriched  
163 transcription factors (TFs) upstream of the co-expressed genes using the ChEA database.  
164 Genes2Networks (G2N) module of X2K connected TFs with protein-protein interaction to  
165 identify transcriptional complexes related to these gene signatures. Protein kinases  
166 responsible for TF complex formation and regulation were recognized through the Kinase  
167 Enrichment Analysis (KEA) module of X2K. The top 10 most enriched TFs and kinases were  
168 ranked based on a combined P-value and z-score value.

169 To have a quick review of the aforementioned online tools, we have presented a  
170 schematic diagram that summarizes their functions in Figure 1.

## 171 **3. Results**



### 172 3.1. *GRINA* mRNA Expression in Various Cancers

173 To examine *GRINA* mRNA expression levels in select normal and cancer types tissues,  
174 we utilized online analytical tools and databases, including Oncomine and TCGA. A  
175 significant number of analyses performed using the Oncomine platform revealed high *GRINA*  
176 expression in breast, colon, gastric, lymphoma, melanoma, ovarian, and prostate cancers  
177 (Figure 2a; Supplementary Table 1). The Oncomine platform also indicated the  
178 downregulation of *GRINA* in oesophageal, head-and-neck, and lung cancers (Figure 2a;  
179 Supplementary Table 1). To confirm the relative levels of *GRINA* expression in normal and  
180 cancerous tissues, we further analyzed expression data using the TCGA data-driven UCSC  
181 Xena online tool, which yielded similar results to those from Oncomine-based analysis  
182 (Figure 2b; Supplementary Table 2). We further experimentally confirmed the expression  
183 pattern of *GRINA* in various cancer cell lines using RT-PCR analysis (Figure 2c). According  
184 to the experimental outcomes, the mRNA expression of *GRINA* was upregulated in the breast  
185 (MCF7 and MDA-MB231 cell lines), colon (HCT116 and HT-29 cell lines), blood (K562  
186 cell line), and ovarian (SKOV3 and A2780 cell lines). At the same time, it was comparatively  
187 downregulated in the esophagus (SEG-1 cell line), liver (HepG2 and SNU475 cell lines), and  
188 lung (A549 cell line) cancer. In summary, analysis with Oncomine and TCGA databases  
189 commonly showed *GRINA* overexpression in multiple cancers. Therefore, based on high  
190 *GRINA* expression levels, we selected breast, colon, gastric, and prostate cancers for further  
191 systematic analysis of *GRINA* expression and its clinical significance. It is worth noting that  
192 we used Oncomine and TCGA databases to present the expression status of *GRINA* in various

193 cancers. The primary purpose of this expression checking was to find the four most common  
194 cancers in terms of high *GRINA* expression. It can be noted that our purpose of the multi-  
195 omics analysis is not to see the *GRINA* expression status individually. Instead, we used multi-  
196 omics analysis to show consistencies between *GRINA* expression and other genetic statuses  
197 such as methylation of *GRINA* promoters, mutation and CNA, and immunostaining results,  
198 as will be analyzed subsequently.

### 199 3.2. *GRINA* Expression Patterns and Patient Survival of Breast Cancer

200 To investigate *GRINA* expression in breast cancer and corresponding normal tissue  
201 samples, we evaluated Oncomine and TCGA datasets. Relative expression levels of *GRINA*  
202 in 21 lobular breast cancer (LBC) and 38 invasive ductal breast cancer (IDBC) tissues were  
203 analyzed in the Zhao dataset. Compared to histologically normal breast tissue ( $n = 3$ ) derived  
204 from IDBC patients used in the Zhao dataset, *GRINA* is significantly overexpressed in both  
205 LBC and IDBC tissues (Figure 3a-b). In addition, *GRINA* mRNA levels are significantly ( $p$   
206  $< 1.63E-12$ ) higher in invasive breast carcinoma (BRIC) tissue than normal tissue (Figure  
207 3c) based on the analysis of 114 normal breast tissue samples and 1097 breast cancer tissue  
208 samples from the TCGA-driven ULCAN dataset. To analyze *GRINA* expression and patient  
209 subclass associations, we determined *GRINA* levels in normal, luminal, human epidermal  
210 growth factor receptor 2 positive (HER2+), and triple-negative breast cancer positive  
211 (TNBC+) groups, which were derived from 833 patient samples in the TCGA dataset using  
212 ULCAN. *GRINA* mRNA levels are significantly higher in luminal ( $p = 1.63E-12$ ), HER2+  
213 ( $p = 2.22E-5$ ), and TNBC+ ( $p = 3.86E-6$ ) subclasses (Figure 3d). In addition, the average

214 methylation level of *GRINA* gene promoters in breast cancer samples is significantly lower  
215 compared to that in normal breast samples (Figure 3e). A lack of methylation of *GRINA*  
216 promoters in breast cancer may thus cause *GRINA* upregulation of this gene. We next  
217 analyzed mutation and copy number alteration (CNA) of *GRINA* in breast cancer using  
218 cBioPortal. Alterations of the *GRINA* gene, including amplification and deep deletion, were  
219 found in 32% of 1088 cases (Figure 3f). *GRINA* mRNA levels were high in approximately  
220 50% of altered samples, suggesting that *GRINA* expression in breast cancer is positively  
221 correlated with CNA status. Such amplification likely underlies increases in *GRINA*  
222 expression.

223 Protein expression patterns of *GRINA* in breast cancer were examined using  
224 immunohistochemical (IHC) staining and the Human Protein Atlas. These results confirm  
225 the overexpression of *GRINA* at the protein levels in breast cancer samples relative to normal  
226 breast tissue (Figure 3g). In addition, we investigated the relationship between *GRINA*  
227 expression and clinical prognosis using the R2: Kaplan Meier Scanner. Patients with high  
228 levels of *GRINA* ( $n = 42$ ) had significantly ( $p = 9.1E-06$ ) lower overall survival compared to  
229 patients with lower *GRINA* levels ( $n = 1054$ ) (Figure 3h). *GRINA* levels are thus significantly  
230 augmented in breast cancer cells and positively correlated with poor patient prognosis.

### 231 3.3. *GRINA* Expression Patterns and Patient Survival of Colon Cancer

232 We next examined *GRINA* characteristics in colon cancer (Figure 2a-d). Upregulation  
233 patterns of *GRINA* in colon cancer have previously been reported [11, 41]; however, the

234 correlation between *GRINA* expression and patient prognosis has not been systematically  
235 analyzed. We thus evaluated *GRINA* expression in microarray datasets for colon cancer and  
236 normal tissues using Oncomine. In addition, relative expression levels of *GRINA* in colon  
237 carcinomas (CC) and 65 rectal adenocarcinomas were analyzed using the Skrzypczak and  
238 Gaedcke datasets. Compared to normal colon tissue, *GRINA* was significantly upregulated in  
239 both cases (Figures 4a and b). We also analyzed *GRINA* levels in 41 colon normal tissue  
240 samples and 286 colon cancer tissue samples. As observed for breast cancer samples, *GRINA*  
241 expression was significantly ( $p < 1E-12$ ) augmented in colon adenocarcinomas (COAD)  
242 compared to normal tissues (Figure 4c).

243 We also analyzed 321 patient samples in the TCGA dataset to examine the relationship  
244 between *GRINA* expression and colon cancer patient subclass. *GRINA* mRNA levels were  
245 significantly elevated in COAD ( $p = 1.63E-12$ ) and mucinous-adenocarcinoma (MADC) ( $p$   
246 =  $8.09E-10$ ) subclasses (Figure 4d), which is supported by the hypomethylation of the  
247 *GRINA* gene promoter in colon cancer specimens. However, the difference between normal  
248 and cancer is not statistically significant (Figure 4e). In addition, mutation and CNA analysis  
249 of *GRINA* in colon cancer samples using cBioPortal revealed that *GRINA* levels positively  
250 correlated with CNA status, as 85 out of 117 colon cancer cases with altered samples showed  
251 high *GRINA* mRNA levels (Figure 4f). While amplification occurred in a handful of cases,  
252 no specific mutation appeared to cause *GRINA* alterations.

253 We also examined *GRINA* protein expression in colon cancer specimens using IHC  
254 staining information from the human protein atlas web. As presented in Figure 4g, *GRINA*

255 overexpression was visible across the entire colon cancer tissue sample compared to normal  
256 tissue. We then analyzed colon cancer patients' clinical outcomes to understand the  
257 relationship between prognosis and *GRINA* expression. The R2: Kaplan Meier Scanner was  
258 applied to data from 147 patients with high *GRINA* expression and 79 patients with low  
259 *GRINA* expression. Patients with high *GRINA* levels experienced poorer relapse-free survival  
260 (Figure 4h). Thus, these results suggest that high *GRINA* expression due to copy number  
261 alterations are common in colon cancer tissue and positively correlates with low patient  
262 survival.

#### 263 3.4. *GRINA* Expression Patterns and Patient Survival in Gastric Cancer

264 We also examined *GRINA* levels in gastric carcinoma (GC) in which *GRINA*  
265 overexpression has previously been observed [13, 42, 43]. We thus performed a systematic  
266 analysis to evaluate the association between *GRINA* expression and clinical outcomes of  
267 gastric cancer patients. Relative *GRINA* mRNA levels in 26 Gastric Intestinal Type  
268 Adenocarcinoma (GITA) and 4 Gastric Mixed Adenocarcinoma (GMA) were analyzed based  
269 on the DErrico datasets using the Oncomine platform. *GRINA* levels are significantly altered  
270 in both types of gastric cancers compared to normal gastric tissue (Figure 5a and b). Analysis  
271 of *GRINA* expression in a larger TCGA dataset consisting of 34 normal stomach tissue  
272 samples and 415 gastric cancer tissue samples confirmed expression patterns described  
273 above, as *GRINA* was significantly ( $p < 1.63E-12$ ) overexpressed in gastric cancer samples  
274 (Figure 5c). Next, TCGA was used to access data from 440 patients and determine whether  
275 it was possible to differentiate between gastric cancer grades based on *GRINA* levels. While

276 *GRINA* mRNA levels were significantly elevated in each gastric cancer grade (Figure 5d),  
277 expression levels alone did not always indicate the cancer stage, as Grade 3 gastric cancers  
278 exhibited the lowest levels of *GRINA*.

279 To evaluate the consistency in *GRINA* levels with *GRINA* promoter methylation, we  
280 compared the beta values of *GRINA* promoter methylation in normal gastric and cancerous  
281 gastric tissues. A large but non-significant difference in beta values between gastric cancer  
282 and normal samples was observed (Figure 5e), suggesting elevated *GRINA* mRNA levels in  
283 gastric cancer. Out of these altered cases, 64% (63 out of 98 altered cases) showed high  
284 *GRINA* mRNA levels (Figure 5f), indicating a positive association between CNA status and  
285 *GRINA* levels in gastric cancer. IHC results with gastric cancer specimens also decisively  
286 indicate increased *GRINA* in gastric cancer (Figure 5g). We next investigated whether  
287 *GRINA* expression likely relates to gastric cancer prognosis. Using the same number of  
288 patients as in the colon cancer analysis, R2: Kaplan Meier Scanner analysis of gastric cancer  
289 cases indicated an association between poor overall patient survival and higher *GRINA*  
290 mRNA levels (Figure 5h). Taken together, *GRINA* overexpression is expected in most gastric  
291 cancer cases and positively associates with poor clinical prognosis.

### 292 3.5. *GRINA* Expression Patterns and Patient Survival of Prostate Cancer

293 *GRINA* mRNA expression is known to be highly upregulated in prostate cancer tissues  
294 compared to normal tissues based on online tools and databases (Figure 6a-d). Our detailed  
295 analysis showed that elevated *GRINA* expression was evident in prostate carcinomas and

296 prostatic intraepithelial neoplasias based on Oncomine (Figure 6a and b) using the Tomlins  
297 datasets. *GRINA* expression was also significantly ( $p = 4.82E-14$ ) upregulated in prostate  
298 adenocarcinomas (PRAD) according to analysis using the TCGA database (Figure 6c) and  
299 considering 52 normal prostate tissue samples and 497 prostate cancer tissue samples. For  
300 prostate cancer, *GRINA* mRNA expression patterns can be translated into Gleason scores  
301 (GS), which range from 1 to 5, and describe whether prostate tissue biopsies resemble normal  
302 tissues (lower score) or abnormal tissues (higher score). As presented in Figure 6d, *GRINA*  
303 levels and the GS exhibited linear relationships, indicating that the most melancholy *GRINA*  
304 expression in prostate cancer represents GS 1. The highest *GRINA* levels represent GS 5, and  
305 *GRINA* levels corresponding to other GS values can be determined using a simple linear  
306 transformation.

307 Methylation status analysis revealed that the *GRINA* gene promoter was significantly  
308 hypomethylated in prostate cancer tissues, confirming mRNA overexpression patterns of  
309 *GRINA* (Figure 6e). In addition, CNA status and *GRINA* expression levels in prostate cancer  
310 were positively correlated, with ~ 67% (60 out of 89 altered cases) of altered samples  
311 showing high levels of *GRINA* mRNA (Figure 6f). Human Protein Atlas-assisted  
312 immunostaining confirmed the *GRINA* protein overexpression in prostate cancer samples  
313 compared to normal samples (Figure 6g). Finally, we investigated the prognostic significance  
314 of *GRINA* expression levels for prostate cancer. R2: Kaplan Meier Scanner survival analysis  
315 of data for a set of 247 patients with high *GRINA* levels and 250 patients with low *GRINA*  
316 levels revealed that prostate cancer patients with high *GRINA* levels showed significantly

317 poorer overall survival compared to the low *GRINA* expression patients (Figure 6h). Overall,  
318 the available data demonstrated altered expression levels of *GRINA* in prostate cancer and  
319 their associated prognostic utility.

### 320 3.6. *GRINA* Expression Patterns and Patient Survival for Additional Cancer Types

321 Although the primary focus of this study was to understand *GRINA* expression levels  
322 and their clinical significance in the four cancers presented above, we also analyzed *GRINA*  
323 expression levels and their relevance to clinical outcomes in other cancers. Based on  
324 Oncomine analyses, *GRINA* expression was elevated in cancers such as lymphoma,  
325 melanoma, ovarian, and sarcoma cancers (Figure 2b). Using TCGA database-enabled  
326 ULCAN analysis, significant upregulation of *GRINA* was found in many additional cancers,  
327 including bladder, cholangial, oesophageal, head-and-neck, liver, rectum, and uterine cancers  
328 (Supplementary Figure 2). Our analysis did not identify any cancers in which *GRINA* was  
329 significantly ( $p < 0.05$ ) downregulated. To understand the prognostic relevance of *GRINA*  
330 levels, analysis of survival rates and *GRINA* levels was performed using the SurvExpress  
331 platform based on TCGA data. This analysis showed that *GRINA* levels positively correlated  
332 with low patient survival in cancers such as the bladder, cholangial, and rectum cancers but  
333 not uterine cancer, as indicated by hazard ratios (Supplementary Figure 3). These findings  
334 suggested that *GRINA* levels are probably associated with biological mechanisms that  
335 promote aggressiveness to some extent in most cancers.

### 336 3.7. Analysis of Potential *GRINA*-miRNA-mRNA Regulatory Networks



337 After analyzing *GRINA* expression patterns and clinical relevance in various cancer  
338 types, we focused on a couple of underlying regulatory mechanisms of *GRINA* in our cancers  
339 of interest. Several studies [44, 45] suggest that microRNA (miRNA)-targeting genes can be  
340 utilized as prognostic predictors for individual cancer patients, conforming to the competing  
341 endogenous RNA (ceRNAs) hypothesis. We thus built and analyzed a potential *GRINA*-  
342 miRNA-mRNA regulatory network. Using the miRSystem, 41 miRNAs were found that  
343 potentially targeted *GRINA*, while starBase provided 54 such miRNAs (Figure 7a). A total  
344 of 18 of these miRNAs appeared on both platforms. It was chosen as candidate miRNAs for  
345 targeting *GRINA* mRNA to use with the starBase web to create a *GRINA*-miRNA-mRNA  
346 regulatory network (Figure 7b). As shown earlier, *GRINA* is upregulated in breast, colon,  
347 gastric, and prostate cancers. To conform with these mRNA expression patterns, expression  
348 levels of *GRINA*-targeting miRNAs should be lower in cancers compared to normal controls,  
349 according to the ceRNA model. We, therefore, examined expression levels of the 18 potential  
350 *GRINA*-targeting miRNAs in the aforementioned cancers. miR-411-5p, miR-654-5p, and  
351 miR-874-3p were marked as representative miRNAs because the expression levels of these  
352 miRNAs are significantly lower in cancerous tissues than other miRNAs. miRNA expression  
353 patterns of miR-411-5p, miR-654-5p, and miR-874-3p in the above cancers followed the  
354 ceRNAs mechanism, except for miR-411-5p in colon cancer and both miR-654-5p and miR-  
355 874-3p in gastric cancer (Figure 7c). In silico algorithms (Starbase v3.0) were also utilized  
356 to identify the binding sites of predicted miRNAs (miR-411, miR-654, and miR-874) that  
357 targeted the 3' UTR region of the *GRINA* gene. The results showed that our predicted

358 miRNAs were explicitly bound to the 3'UTR region of the *GRINA* gene, implying direct  
359 prevention of *GRINA* transcription via miR-411, miR-654, and miR-874 (Figure 7d (i-iii)).  
360 Our findings suggest that *GRINA* may have oncogenic roles in breast and prostate cancers  
361 via this miRNA-mRNA regulatory network. However, other unknown factors could  
362 overshadow the roles of the miRNA-mRNA network on the oncogenic behavior of *GRINA*  
363 in the colon and gastric cancers.

### 364 3.8. Identification and Functional Enrichment Analysis of Genes Co-expressed with *GRINA*

365 To understand how *GRINA* functions in conjunction with other genes in signaling  
366 pathways in breast, colon, gastric, and prostate cancers, co-expression with *GRINA* was  
367 analyzed using TCGA data through the R2: Genomics Analysis and Visualization Platform.  
368 Eighty-three genes were upregulated with *GRINA* upregulation ("Positive Cluster") (Figure  
369 8a), while 21 genes were downregulated with *GRINA* upregulation ("Negative Cluster")  
370 (Figure 8d). To understand the function of these genes, gene ontology (GO) functional  
371 annotation and pathway enrichment analysis were performed using the Enrichr platform.  
372 Three GO functional annotation categories for each cluster were obtained: biological process,  
373 cellular component, and molecular function. For the positive cluster, attachment of GPI  
374 (glycosylphosphatidylinositol) anchor to protein, GPI anchor binding, and mRNA cleavage  
375 and polyadenylation specificity factor complex were the most significantly represented GO  
376 terms in the biological process, cellular component, and molecular function, respectively  
377 (Supplementary Figure 4a-c). Conversely, entirely different sets of ontologies were  
378 associated with the negatively co-expressed gene cluster. The most prominent cellular

379 component is mutLapha complex, with several critical biological processes including DNA  
380 binding, siRNA binding, and helicase activity and molecular functions related to this cluster  
381 (Supplementary Figure 4d-f).

382 We performed Reactome and KEGG (Kyoto Encyclopedia of Genes and Genomes)  
383 pathway analysis for both the positive and negative clusters. Our Reactome pathway analysis  
384 revealed that some positive cluster genes were associated with pathways related to cell  
385 surface events, including insulin receptor recycling, transferrin endocytosis and recycling,  
386 and attachment of GPI anchors to uPAR (Figure 8b). Some categories involved post-  
387 transcriptional protein regulation, such as the synthesis of GPI-anchored proteins. For  
388 negative cluster genes, pathways related to the cell cycle and transcriptional regulation, such  
389 as cell cycle, gene expression, and gene silencing by RNA, predominated (Figure 8e). KEGG  
390 analysis indicated that glycosylphosphatidylinositol (GPI)-anchor biosynthesis, which was  
391 also found in Reactome pathway analysis, was the prominent pathway for the positive cluster  
392 (Figure 8c). In addition, KEGG analysis indicated that some negative cluster genes were  
393 associated with p53 signaling, apoptosis, and RNA transport (Figure 8f). Thus, our findings  
394 suggested that the biological pathways involved in regulating genes positively co-expressed  
395 with GRINA are fundamentally different from those showing negative co-expression with  
396 GRINA. GRINA may be associated with specific critical pathways related to cell surface  
397 dynamics and post-transcriptional control in cancer development.

398 3.9. Upstream Regulator Analysis of Genes Co-expressed with GRINA

399 We also identified transcription factors, intermediate proteins, and associated protein  
400 kinases potentially related to regulating co-expression of genes with *GRINA* using the  
401 Expression2Kinases (X2K) platform. X2K analysis revealed that PML, HNF4A, and TAF1  
402 are major transcription factors that bind to positive cluster genes (Figure 9a; Supplementary  
403 Table 3), whereas STAT3, PPARG, and EGR1 are prominent transcription factors associated  
404 with negative cluster genes (Figure 9b; Supplementary Table 3). Transcription factors  
405 associated with upregulated genes were generally distinct from those associated with  
406 downregulated genes except for TAF1.

407 We also noticed that these transcription factors of interest for both the positive and  
408 negative clusters related to a large number of intermediate proteins that may assist with  
409 transcription factor activation. In addition, protein kinases such as MAPK14, ATM, and  
410 CK2ALPHA for positively co-expressed genes (Figure 9a; Supplementary Table 4) and  
411 GK3B, MAPK14, and MAPK3 for negatively co-expressed genes (Figure 9b; Supplementary  
412 Table 4) showed connections with many intermediate proteins associated with transcription  
413 factors belonging to each cluster. The only protein kinase in common between the positive  
414 and negative clusters was MAPK14. Promyelocytic leukemia protein (PML) and signal  
415 transducer and activator of transcription 3 (STAT3) showed the largest numbers of  
416 direct/indirect connections. They were labeled hub proteins of the positive and negative  
417 cluster genes, respectively. Our findings suggest that candidate hub proteins and their  
418 downstream targets may play significant roles in the progression of breast, colon, gastric, and

419 prostate cancers. These transcription factors thus can be considered potential biomarkers and  
420 may be utilized in targeted therapy for the above cancers.

#### 421 **4. Discussion**

422 *GRINA* belongs to the TMBIM protein family and is involved in calcium homeostasis,  
423 regulating various vital processes such as cell survival and neurotransmitter release.  
424 Alterations in the roles of *GRINA* are associated with schizophrenia and celiac disease [41].  
425 Irregular *GRINA* expression patterns are found in several cancers, and elevated *GRINA* levels  
426 promote gastric cancer growth [13]. In contrast, *GRINA* is downregulated in the post-mortem  
427 superior temporal gyrus of schizophrenia patients [46]. Although its relevance is still  
428 unknown, alternative splicing of *GRINA* is found in the cortex of Alzheimer's patients and  
429 cutaneous horn cancer [47]. *GRINA* is one of the most common NMDA receptors. NMDA  
430 receptors' expressions were reported in human ovarian cancer tissues and human ovarian  
431 cancer cell lines [8]. As they were expressed in breast cancer and small-cell lung cancer,  
432 these receptors can potentially be targeted to trigger cancer cell death [3, 4]. Overexcitation  
433 of the extrasynaptic receptors in the peritumoral neurons was linked to the development of  
434 peritumoral seizures [48]. *GRINA* is also predominantly expressed in the brain [49]. In our  
435 current study, we analyzed *GRINA* expression in various cancers using bioinformatics tools  
436 and multiple gene expression datasets. Our analysis showed that *GRINA* expression is  
437 significantly elevated in multiple cancer cells compared to their normal counterparts. The  
438 consistency of *GRINA* expression patterns in each cancer of interest was crosschecked using  
439 different databases and confirmed based on *GRINA* promoter and immunostaining results.

440 *GRINA* mRNA levels positively correlated with alteration frequency and negatively  
441 correlated with patient survival in breast, colon, gastric, and prostate cancers. These results  
442 suggest that *GRINA* function significantly affects the prognosis and progression of various  
443 cancers. In addition, the consistent elevation of *GRINA* expression in cancers indicates some  
444 commonality amongst different cancer types where *GRINA*-centric regulatory mechanisms  
445 may function. As *GRINA* expression is variable and has a wide range in many tumors, the  
446 question then comes to interpreting this variability in the clinical setting. In molecular  
447 therapeutic target viewpoint, the elevated expression of *GRINA* in the cancer of interest first  
448 conveys biomarker significance. Because of the confirmed augmented expression, the  
449 physician might be more confident to apply the targeted therapies. Then, the strength to which  
450 these targeted drugs should be clinically applied does partly come from *GRINA* expression  
451 variability. However, adequate prior clinical trials must be conducted to see whether they can  
452 be approved for broader use. The existence of co-expressed genes with *GRINA* can appear as  
453 additional confirmation of the biomarker role of *GRINA* and the strength of the *GRINA*-  
454 mediated targeted therapies.

455 To reveal potential *GRINA*-related molecular mechanisms and signaling pathways, we  
456 examined *GRINA* miRNA-mRNA regulatory networks, the identities and function of genes  
457 co-expressed with *GRINA*, and upstream regulator analysis of those co-expressed genes.  
458 Analysis of miRNA-mediated post-transcriptional regulation of *GRINA* mRNAs identified  
459 miR-411-5p, miR-654-5p, and miR-874-3p as miRNAs of interest, the expression of which  
460 was significantly lower in breast and prostate cancers, following the ceRNA model.

461 Relatively low expression levels of these miRNAs were also noticed in the colon and gastric,  
462 with some minor exceptions. There exist some evidence that miRNA post-transcriptionally  
463 regulates *GRINA* expression at both mRNA and protein levels. A study reported that several  
464 microRNAs such as miR-411 were predicted to target alcohol-responsive mRNAs, including  
465 *GRINA* [50].

466 Interestingly, miR-411 is also found in our miRNA-mRNA analysis. *GRINA* was also  
467 significantly upregulated in human trabecular meshwork cells after overexpression of miR-  
468 24 mimic [51]. Moreover, *GRINA* has an important activity controlling cell death induced by  
469 ER stress suggesting a functional interconnection between *GRINA* and its role in the control  
470 of cell death and ER calcium homeostasis [52]. Our analysis indicates that a regulatory  
471 network consisting of miRNAs, including miR-411-5p, miR-654-5p, and miR-874-3p, may  
472 facilitate the oncogenic roles of *GRINA* in certain cancers.

473 Co-expression analysis may also provide important information for investigating  
474 mechanisms of *GRINA* function. A positive correlation between the expression of several  
475 genes and *GRINA* levels was observed in breast, colon, gastric, and prostate cancers, 83 of  
476 which occurred in all cancers. In contrast, the number of negatively co-expressed genes  
477 present in all cancers examined was 21. Functional enrichment analysis of positively co-  
478 expressed genes revealed that GPI anchor to protein, GPI anchor binding, and mRNA  
479 cleavage and polyadenylation specificity factor complex were the most significantly enriched  
480 GO terms. Reactome pathway analysis showed that insulin receptor recycling, transferrin  
481 endocytosis and recycling, attachment of GPI anchor to uPAR, and post-translational

482 modification and synthesis of GPI-anchored proteins were the major pathways associated  
483 with the positively co-expressed genes. Cell surface dynamics and post-transcriptional  
484 modification of *GRINA* have also been previously reported [41, 53, 54]. Noticeably, GO  
485 terms and pathways related to genes negatively co-expressed with *GRINA* were completely  
486 different from those related to positively co-expressed genes. Our findings suggest that  
487 pathways involving cell surface dynamics and post-transcriptional regulation may underpin  
488 the role of *GRINA* in cancer.

489 We next performed upstream regulator analysis of genes co-expressed with *GRINA* to  
490 identify associated major transcription factors. This analysis revealed that transcription  
491 factors regulating positive and negative cluster genes were influenced by many intermediate  
492 proteins modulated by specific kinases. The major transcription factors binding to positive  
493 cluster genes were PML, HNF4A, and TAF1, while major transcription factors associated  
494 with negative cluster genes were STAT3, PPARG, and EGR1. In addition, PML and STAT3  
495 acted as hub proteins of the positively correlated genes and negatively correlated genes,  
496 respectively. The roles of PML and STAT3 as hub proteins in the said cancers are also  
497 evident from previous research. For example, the study showed that PML promotes  
498 metastasis of TNBC [55], and targeting PML elicits its growth suppression [56]. Also, the  
499 expression level of PML is the potential to predict prostate cancer progression [57] and  
500 gastric cancer [58]. Furthermore, histochemical analyses of clinical samples have shown  
501 PML to be downregulated in colon cancer [59]. On the other hand, STAT3 might serve as a  
502 therapeutic target for various cancers such as gastric [60] and TNBC [61]. Our findings thus



503 indicate that the PML could be used as a biomarker in *GRINA*-mediated targeted therapy for  
504 breast, colon, gastric, and prostate cancers.

505 In this study, we investigated the expression, methylation, genetic alteration, and  
506 immunostaining patterns of *GRINA*. We evaluated its prognostic use through organized data  
507 analysis using several established bioinformatics tools, with expression and clinical data  
508 obtained from various open-source platforms. Our study showed that the expression,  
509 methylation, and immunostaining of *GRINA* collectively convey biomarker significance for  
510 breast, colon, gastric, and prostate cancers, among others. The overexpression of *GRINA* was  
511 in agreement with its promoter methylation level in the aforementioned cancers. However,  
512 the results of hypomethylation of the *GRINA* gene promoter in breast and prostate cancers  
513 were more significant compared to that in colon and gastric cancers. Our analysis also  
514 indicates that high *GRINA* expression positively correlates with poor prognosis in patients  
515 with the said cancers. The silico data mining of miRNA reveals that the regulatory network  
516 containing miR-411-5p, miR-654-5p, and miR-874-3p may contribute to the oncogenic  
517 roles of *GRINA* to some extent. In sum, this study tried to gain some insights into the  
518 oncogenic roles of *GRINA* by revealing the respective miRNA-mRNA interactions, genes  
519 co-expressed with *GRINA* and their associated pathways, and specific kinases, transcription  
520 factors, and accompanying intermediate proteins that could collectively underpin the  
521 regulation of *GRINA* expression. However, it is worth to note that data mining only  
522 constitutes the first step of a scientific investigation. Since there is no prominent and useful  
523 study and review on *GRINA* with data analysis perspective, we thus became motivated to

524 investigate the expression and related molecular mechanisms of the *GRINA* gene and find  
525 their relevance to prognostic significance through systematic data analysis using publicly  
526 available expression and clinical outcomes data. On that, further research is required to  
527 validate the outcomes of this research.

## 528 **5. Conclusions**

529 In our multiomics analysis of *GRINA* expression in cancer databases, we provide  
530 evidence of a relationship between altered *GRINA* expression and clinical outcomes. Our  
531 study reveals the significance of *GRINA* expression and possible *GRINA*-related molecular  
532 mechanisms and pathways in cancer progression. The findings of this study thus may offer  
533 valuable insights into the use of *GRINA* as a prospective therapeutic target for various  
534 cancers.

535 **Abbreviations:** BLCA, bladder urothelial carcinoma; BRCA, invasive breast carcinoma;  
536 CESC, Cervical squamous cell carcinoma; CHOL, cholangiocarcinoma; COAD, colon  
537 adenocarcinoma; ESCA, esophageal carcinoma; GBM, glioblastoma  
538 multiforme; HNSC, head and neck squamous cell carcinoma; KICH, kidney  
539 chromophobe; KIRC, kidney renal clear cell carcinoma; KIRP, Kidney renal papillary cell  
540 carcinoma; LIHC, Liver hepatocellular carcinoma; LUAD, Lung adenocarcinoma; LUSC,  
541 Lung squamous cell carcinoma; PAAD, pancreatic adenocarcinoma; PRAD, Prostate  
542 adenocarcinoma; PCPG, Pheochromocytoma and Paraganglioma; READ, rectum  
543 adenocarcinoma; SARC, Sarcoma; SKCM, Skin Cutaneous Melanoma; THCA, thyroid  
544 carcinoma; THYM, Thymoma; STAD, stomach adenocarcinoma; UCEC, uterine corpus  
545 endometrial carcinoma; LAML, Acute Myeloid Leukemia; OV, Ovarian serous

546 cystadenocarcinoma; LBC, lobular breast cancer; IDBC, invasive ductal breast cancer;  
547 HER2, human epidermal growth factor receptor 2; TNBC, triple-negative breast cancer; CC,  
548 colon cancer; RADC, rectal adenocarcinomas; COAD, colon adenocarcinoma; MADC,  
549 mucinous-adenocarcinoma; GM, Gastric Mucosa; GITA, Gastric Intestinal Type  
550 Adenocarcinoma; GMA, Gastric Mixed Adenocarcinoma; STAD, stomach adenocarcinoma;  
551 PG, Prostate Gland; PC, Prostate Carcinoma; PIN, Prostatic Intraepithelial Neoplasia; GS,  
552 Gleason scores.

553 **Author Contributions:** Conceptualization, S.K.S.; methodology, S.K.S., and S.M.R.I.;  
554 validation, S.K.S., and S.M.R.I.; formal analysis, S.K.S., S.M.R.I., S.E.-S., F.T., J.D., M.A.,  
555 and S.-G.C; investigation, S.K.S., and S.M.R.I.; data curation, S.K.S., and S.M.R.I.; Funding  
556 acquisition, S.-G.C.; writing—original draft preparation, S.M.R.I.; writing—review and  
557 editing, S.K.S.; visualization, S.K.S.; supervision, S.K.S., and S.M.R.I. All authors have read  
558 and agreed to the published version of the manuscript.

559 **Funding:** This study was supported by grants from the National Research Foundation (NRF)  
560 funded by the Korean government (grant no. 2019M3A9H1030682 and  
561 2015R1A5A1009701).

562 **Acknowledgments:** We are grateful to the contributors of data to Oncomine, UCSC Xena,  
563 ULCAN, Human Protein Atlas, cBioPortal, R2: Kaplan Meier Scanner web, SurvExpress  
564 web, miRSystem, starBase v3.0, InteractiVenn, Enrichr web, and Expression2Kinases (X2K)  
565 web, which provides a Web resource for exploring, visualizing, and analyzing  
566 multidimensional cancer genomics data.

567 **Conflicts of Interest:** The authors declare no conflict of interest. The funders had no role in  
568 the design of the study; in the collection, analyses, or interpretation of data; in the writing of  
569 the manuscript, or in the decision to publish the results.

## 570 **References**

- 571 [1] S.I. Deutsch, A.H. Tang, J.A. Burket, A.D. Benson, NMDA receptors on the surface of  
572 cancer cells: Target for chemotherapy?, *Biomed Pharmacother*, 68 (2014) 493-496.
- 573 [2] A. Stepulak, H. Luksch, C. Gebhardt, O. Uckermann, J. Marzahn, M. Sifringer, W.  
574 Rzeski, C. Staufner, K.S. Brocke, L. Turski, C. Ikonomidou, Expression of glutamate  
575 receptor subunits in human cancers, *Histochem Cell Biol*, 132 (2009) 435-445.
- 576 [3] W.G. North, G. Gao, A. Jensen, V.A. Memoli, J. Du, NMDA receptors are expressed by  
577 small-cell lung cancer and are potential targets for effective treatment, *Clinical pharmacology*  
578 : advances and applications, 2 (2010) 31-40.
- 579 [4] W.G. North, G. Gao, V.A. Memoli, R.H. Pang, L. Lynch, Breast cancer expresses  
580 functional NMDA receptors, *Breast cancer research and treatment*, 122 (2010) 307-314.
- 581 [5] W.K. Nahm, B.D. Philpot, M.M. Adams, E.V. Badiavas, L.H. Zhou, J. Butmarc, M.F.  
582 Bear, V. Falanga, Significance of N-methyl-d-aspartate (NMDA) receptor-mediated  
583 signaling in human keratinocytes, *Journal of cellular physiology*, 200 (2004) 309-317.
- 584 [6] H. Tamura, M. Suzuki, Y. Moriya, H. Hoshino, T. Okamoto, S. Yoshida, I. Yoshino,  
585 Aberrant methylation of N-methyl-D-aspartate receptor type 2B (NMDAR2B) in non-small  
586 cell carcinoma, *BMC cancer*, 11 (2011) 220.
- 587 [7] C. Collins, C. Duff, A.M.V. Duncan, R. Planellscases, W. Sun, A. Norremolle, E.  
588 Michaelis, M. Montal, R. Worton, M.R. Hayden, Mapping of the Human Nmda Receptor  
589 Subunit (Nmdar1) and the Proposed Nmda Receptor Glutamate-Binding Subunit (Nmdara1)  
590 to Chromosome-9q34.3 and Chromosome-8, Respectively, *Genomics*, 17 (1993) 237-239.
- 591 [8] W.G. North, F. Liu, R. Tian, H. Abbasi, B. Akerman, NMDA receptors are expressed in  
592 human ovarian cancer tissues and human ovarian cancer cell lines, *Clin Pharmacol-Adv A*,  
593 7 (2015) 111-117.
- 594 [9] X. Gao, H.Y. Wang, S.B. Cai, M.R. Saadat-zadeh, H. Hanenberg, K.E. Pollok, A.A.  
595 Cohen-Gadol, J.H. Chen, Phosphorylation of NMDA 2B at S1303 in human glioma  
596 peritumoral tissue: implications for glioma epileptogenesis, *Neurosurg Focus*, 37 (2014).
- 597 [10] K. Watanabe, T. Kanno, T. Oshima, H. Miwa, C. Tashiro, T. Nishizaki, The NMDA  
598 receptor NR2A subunit regulates proliferation of MKN45 human gastric cancer cells,  
599 *Biochem Bioph Res Co*, 367 (2008) 487-490.
- 600 [11] D. Rojas-Rivera, C. Hetz, TMBIM protein family: ancestral regulators of cell death,  
601 *Oncogene*, 34 (2015) 269-280.
- 602 [12] D. Rojas-Rivera, R. Armisen, A. Colombo, G. Martinez, A.L. Eguiguren, A. Diaz, S.  
603 Kiviluoto, D. Rodriguez, M. Patron, R. Rizzuto, G. Bultynck, M.L. Concha, J. Sierralta, A.  
604 Stutzin, C. Hetz, TMBIM3/GRINA is a novel unfolded protein response (UPR) target gene

- 605 that controls apoptosis through the modulation of ER calcium homeostasis, *Cell Death Differ*,  
606 19 (2012) 1013-1026.
- 607 [13] D.H. Xu, Q. Li, H. Hu, B. Ni, X. Liu, C. Huang, Z.Z. Zhang, G. Zhao, Transmembrane  
608 protein GRINA modulates aerobic glycolysis and promotes tumor progression in gastric  
609 cancer, *J Exp Clin Canc Res*, 37 (2018).
- 610 [14] P. Habib, A.-S. Stamm, T. Zeyen, R. Noristani, A. Slowik, C. Beyer, T. Wilhelm, M.  
611 Huber, D. Komnig, J.B. Schulz, EPO regulates neuroprotective Transmembrane BAX  
612 Inhibitor-1 Motif-containing (TMBIM) family members GRINA and FAIM2 after cerebral  
613 ischemia-reperfusion injury, *Experimental neurology*, 320 (2019) 112978.
- 614 [15] C. Connolly, S. Madden, D. Buggy, H. Gallagher, Expression of anaesthetic and  
615 analgesic drug target genes in excised breast tumour tissue: Association with clinical disease  
616 recurrence or metastasis, *PloS one*, 12 (2017) e0177105.
- 617 [16] D.B. Goswami, C.S. Jernigan, A. Chandran, A.H. Iyo, W.L. May, M.C. Austin, C.A.  
618 Stockmeier, B. Karolewicz, Gene expression analysis of novel genes in the prefrontal cortex  
619 of major depressive disorder subjects, *Prog Neuro-Psychoph*, 43 (2013) 126-133.
- 620 [17] H.-K. Kim, K.R. Bhattarai, R.P. Junjappa, J.H. Ahn, S.H. Pagire, H.J. Yoo, J. Han, D.  
621 Lee, K.-W. Kim, H.-R. Kim, TMBIM6/BI-1 contributes to cancer progression through  
622 assembly with mTORC2 and AKT activation, *Nature communications*, 11 (2020) 1-16.
- 623 [18] R.P. Junjappa, H.K. Kim, S.Y. Park, K.R. Bhattarai, K.W. Kim, J.W. Soh, H.R. Kim,  
624 H.J. Chae, Expression of TMBIM6 in Cancers: The Involvement of Sp1 and PKC, *Cancers*,  
625 11 (2019).
- 626 [19] K. Chen, X. Li, G. Song, T. Zhou, Y. Long, Q. Li, S. Zhong, Z. Cui, Deficiency in the  
627 membrane protein Tmbim3a/Grinaa initiates cold-induced ER stress and cell death by  
628 activating an intrinsic apoptotic pathway in zebrafish, *J Biol Chem*, 294 (2019) 11445-11457.
- 629 [20] D.R. Rhodes, S. Kalyana-Sundaram, V. Mahavisno, R. Varambally, J.J. Yu, B.B.  
630 Briggs, T.R. Barrette, M.J. Anstet, C. Kincaid-Beal, P. Kulkarni, S. Varambally, D. Ghoshy,  
631 A.M. Chinnaiyan, Oncomine 3.0: Genes, pathways, and networks in a collection of 18,000  
632 cancer gene expression profiles, *Neoplasia*, 9 (2007) 166-180.
- 633 [21] D.R. Rhodes, J.J. Yu, K. Shanker, N. Deshpande, R. Varambally, D. Ghosh, T. Barrette,  
634 A. Pandey, A.M. Chinnaiyan, ONCOMINE: A cancer microarray database and integrated  
635 data-mining platform, *Neoplasia*, 6 (2004) 1-6.
- 636 [22] S.K. Saha, Y. Jeong, S. Cho, S.G. Cho, Systematic expression alteration analysis of  
637 master reprogramming factor OCT4 and its three pseudogenes in human cancer and their  
638 prognostic outcomes, *Sci Rep-Uk*, 8 (2018).
- 639 [23] S.K. Saha, S.M.R. Islam, K.S. Kwak, M.S. Rahman, S.G. Cho, PROM1 and PROM2  
640 expression differentially modulates clinical prognosis of cancer: a multiomics analysis,  
641 *Cancer gene therapy*, (2019).
- 642 [24] M. Goldman, B. Craft, A. Brooks, J. Zhu, D. Haussler, The UCSC Xena Platform for  
643 cancer genomics data visualization and interpretation, *BioRxiv*, (2018) 326470.
- 644 [25] D.S. Chandrashekar, B. Bashel, S.A.H. Balasubramanya, C.J. Creighton, I. Ponce-  
645 Rodriguez, B. Chakravarthi, S. Varambally, UALCAN: A Portal for Facilitating Tumor  
646 Subgroup Gene Expression and Survival Analyses, *Neoplasia*, 19 (2017) 649-658.

- 647 [26] S.K. Saha, Y. Yin, H.S. Chae, S.-G. Cho, Opposing Regulation of Cancer Properties via  
648 KRT19-Mediated Differential Modulation of Wnt/ $\beta$ -Catenin/Notch Signaling in Breast and  
649 Colon Cancers, *Cancers*, 11 (2019) 99.
- 650 [27] M. Uhlen, E. Bjorling, C. Agaton, C.A. Szgyarto, B. Amini, E. Andersen, A.C.  
651 Andersson, P. Angelidou, A. Asplund, C. Asplund, L. Berglund, K. Bergstrom, H. Brumer,  
652 D. Cerjan, M. Ekstrom, A. Elobeid, C. Eriksson, L. Fagerberg, R. Falk, J. Fall, M. Forsberg,  
653 M.G. Bjorklund, K. Gumbel, A. Halimi, I. Hallin, C. Hamsten, M. Hansson, M. Hedhammar,  
654 G. Hercules, C. Kampf, K. Larsson, M. Linskog, W. Lodewyckx, J. Lund, J. Lundeberg, K.  
655 Magnusson, E. Malm, P. Nilsson, J. Odling, P. Oksvold, I. Olsson, E. Oster, J. Ottosson, L.  
656 Paavilainen, A. Persson, R. Rimini, J. Rockberg, M. Runeson, A. Sivertsson, A. Skollermo,  
657 J. Steen, M. Stenvall, F. Sterky, S. Stromberg, M. Sundberg, H. Tegel, S. Tourle, E. Wahlund,  
658 A. Walden, J.H. Wan, H. Wernerus, J. Westberg, K. Wester, U. Wrethagen, L.L. Xu, S.  
659 Hober, F. Ponten, A human protein atlas for normal and cancer tissues based on antibody  
660 proteomics, *Mol Cell Proteomics*, 4 (2005) 1920-1932.
- 661 [28] M. Uhlen, L. Fagerberg, B.M. Hallstrom, C. Lindskog, P. Oksvold, A. Mardinoglu, A.  
662 Sivertsson, C. Kampf, E. Sjostedt, A. Asplund, I. Olsson, K. Edlund, E. Lundberg, S. Navani,  
663 C.A. Szgyarto, J. Odeberg, D. Djureinovic, J.O. Takanen, S. Hober, T. Alm, P.H. Edqvist,  
664 H. Berling, H. Tegel, J. Mulder, J. Rockberg, P. Nilsson, J.M. Schwenk, M. Hamsten, K. von  
665 Feilitzen, M. Forsberg, L. Persson, F. Johansson, M. Zwahlen, G. von Heijne, J. Nielsen, F.  
666 Ponten, *Proteomics. Tissue-based map of the human proteome*, *Science*, 347 (2015)  
667 1260419.
- 668 [29] J.J. Gao, B.A. Aksoy, U. Dogrusoz, G. Dresdner, B. Gross, S.O. Sumer, Y.C. Sun, A.  
669 Jacobsen, R. Sinha, E. Larsson, E. Cerami, C. Sander, N. Schultz, *Integrative Analysis of*  
670 *Complex Cancer Genomics and Clinical Profiles Using the cBioPortal*, *Sci Signal*, 6 (2013).
- 671 [30] E. Cerami, J. Gao, U. Dogrusoz, B.E. Gross, S.O. Sumer, B.A. Aksoy, *The cBio Cancer*  
672 *Genomics Portal: An Open Platform for Exploring Multidimensional Cancer Genomics Data*  
673 (vol 2, pg 401, 2012), *Cancer Discov*, 2 (2012) 960-960.
- 674 [31] J. Koster, J.J. Molenaar, R. Versteeg, R2: Accessible web-based genomics analysis and  
675 visualization platform for biomedical researchers, *Cancer Res*, 75 (2015).
- 676 [32] R. Aguirre-Gamboa, H. Gomez-Rueda, E. Martinez-Ledesma, A. Martinez-Torteya, R.  
677 Chacolla-Huaranga, A. Rodriguez-Barrientos, J.G. Tamez-Pena, V. Trevino, *SurvExpress:*  
678 *An Online Biomarker Validation Tool and Database for Cancer Gene Expression Data Using*  
679 *Survival Analysis*, *PloS one*, 8 (2013).
- 680 [33] T.-P. Lu, C.-Y. Lee, M.-H. Tsai, Y.-C. Chiu, C.K. Hsiao, L.-C. Lai, E.Y. Chuang,  
681 *miRSystem: an integrated system for characterizing enriched functions and pathways of*  
682 *microRNA targets*, *PloS one*, 7 (2012) e42390.
- 683 [34] J.-H. Li, S. Liu, H. Zhou, L.-H. Qu, J.-H. Yang, *starBase v2. 0: decoding miRNA-*  
684 *ceRNA, miRNA-ncRNA and protein-RNA interaction networks from large-scale CLIP-Seq*  
685 *data*, *Nucleic acids research*, 42 (2013) D92-D97.
- 686 [35] J.C. Oliveros, *VENNY. An interactive tool for comparing lists with Venn Diagrams.*  
687 2007, in, 2015.
- 688 [36] H. Heberle, G.V. Meirelles, F.R. da Silva, G.P. Telles, R. Minghim, *InteractiVenn: a*  
689 *web-based tool for the analysis of sets through Venn diagrams*, *Bmc Bioinformatics*, 16  
690 (2015).

- 691 [37] E.Y. Chen, C.M. Tan, Y. Kou, Q.N. Duan, Z.C. Wang, G.V. Meirelles, N.R. Clark, A.  
692 Ma'ayan, Enrichr: interactive and collaborative HTML5 gene list enrichment analysis tool,  
693 *Bmc Bioinformatics*, 14 (2013).
- 694 [38] M.V. Kuleshov, M.R. Jones, A.D. Rouillard, N.F. Fernandez, Q.N. Duan, Z.C. Wang,  
695 S. Koplev, S.L. Jenkins, K.M. Jagodnik, A. Lachmann, M.G. McDermott, C.D. Monteiro,  
696 G.W. Gundersen, A. Ma'ayan, Enrichr: a comprehensive gene set enrichment analysis web  
697 server 2016 update, *Nucleic acids research*, 44 (2016) W90-W97.
- 698 [39] D.J.B. Clarke, M.V. Kuleshov, B.M. Schilder, D. Torre, M.E. Duffy, A.B. Keenan, A.  
699 Lachmann, A.S. Feldmann, G.W. Gundersen, M.C. Silverstein, Z.C. Wang, A. Ma'ayan,  
700 eXpression2Kinases (X2K) Web: linking expression signatures to upstream cell signaling  
701 networks, *Nucleic acids research*, 46 (2018) W171-W179.
- 702 [40] E.Y. Chen, H.L. Xu, S. Gordonov, M.P. Lim, M.H. Perkins, A. Ma'ayan,  
703 Expression2Kinases: mRNA profiling linked to multiple upstream regulatory layers,  
704 *Bioinformatics*, 28 (2012) 105-111.
- 705 [41] V. Jimenez-Gonzalez, E. Ogalla-Garcia, M. Garcia-Quintanilla, A. Garcia-Quintanilla,  
706 Deciphering GRINA/Lifeguard1: Nuclear Location, Ca<sup>2+</sup> Homeostasis and Vesicle  
707 Transport, *Int J Mol Sci*, 20 (2019).
- 708 [42] L. Cheng, Q. Zhang, S. Yang, Y.Q. Yang, W. Zhang, H.J. Gao, X.X. Deng, Q.H. Zhang,  
709 A 4-gene panel as a marker at chromosome 8q in Asian gastric cancer patients, *Genomics*,  
710 102 (2013) 323-330.
- 711 [43] L. Cheng, P. Wang, S. Yang, Y.Q. Yang, Q. Zhang, W. Zhang, H.S. Xiao, H.J. Gao,  
712 Q.H. Zhang, Identification of genes with a correlation between copy number and expression  
713 in gastric cancer, *Bmc Med Genomics*, 5 (2012).
- 714 [44] W.Y. Lou, J.X. Liu, B.S. Ding, L.Q. Jin, L. Xu, X. Li, J. Chen, W.M. Fan, Five miRNAs-  
715 mediated PIEZO2 downregulation, accompanied with activation of Hedgehog signaling  
716 pathway, predicts poor prognosis of breast cancer, *Aging-Us*, 11 (2019) 2628-2652.
- 717 [45] N. Sheng, Y.Z. Xu, Q.H. Xi, H.Y. Jiang, C.Y. Wang, Y. Zhang, Q. Ye, Overexpression  
718 of KIF2A is Suppressed by miR-206 and Associated with Poor Prognosis in Ovarian Cancer,  
719 *Cell Physiol Biochem*, 50 (2018) 810-822.
- 720 [46] N.A. Bowden, R.J. Scott, P.A. Tooney, Altered gene expression in the superior temporal  
721 gyrus in schizophrenia, *Bmc Genomics*, 9 (2008).
- 722 [47] A.K. Patel, V.D. Bhatt, A.K. Tripathi, M.R. Sajani, S.J. Jakhesara, P.G. Koringa, C.G.  
723 Joshi, Identification of novel splice variants in horn cancer by RNA-Seq analysis in Zebu  
724 cattle, *Genomics*, 101 (2013) 57-63.
- 725 [48] T. Yamaji, K. Nishikawa, K. Hanada, Transmembrane BAX Inhibitor Motif Containing  
726 (TMBIM) Family Proteins Perturbs a trans-Golgi Network Enzyme, Gb3 Synthase, and  
727 Reduces Gb3 Biosynthesis, *J Biol Chem*, 285 (2010) 35505-35518.
- 728 [49] M. Grzmil, S. Kaulfuss, P. Thelen, B. Hemmerlein, S. Schweyer, S. Obenauer, T.W.  
729 Kang, P. Burfeind, Expression and functional analysis of Bax inhibitor-1 in human breast  
730 cancer cells, *The Journal of pathology*, 208 (2006) 340-349.
- 731 [50] D. Most, C. Leiter, Y.A. Blednov, R.A. Harris, R.D. Mayfield, Synaptic microRNAs  
732 Coordinately Regulate Synaptic mRNAs: Perturbation by Chronic Alcohol Consumption,  
733 *Neuropsychopharmacol*, 41 (2016) 538-548.

- 734 [51] C. Luna, G. Li, J. Qiu, D.L. Epstein, P. Gonzalez, MicroRNA-24 regulates the  
735 processing of latent TGF $\beta$ 1 during cyclic mechanical stress in human trabecular meshwork  
736 cells through direct targeting of FURIN, *Journal of cellular physiology*, 226 (2011) 1407-  
737 1414.
- 738 [52] H. Urra, E. Dufey, F. Lisbona, D. Rojas-Rivera, C. Hetz, When ER stress reaches a dead  
739 end, *Bba-Mol Cell Res*, 1833 (2013) 3507-3517.
- 740 [53] R. van der Lee, M. Buljan, B. Lang, R.J. Weatheritt, G.W. Daughdrill, A.K. Dunker, M.  
741 Fuxreiter, J. Gough, J. Gsponer, D.T. Jones, P.M. Kim, R.W. Kriwacki, C.J. Oldfield, R.V.  
742 Pappu, P. Tompa, V.N. Uversky, P.E. Wright, M.M. Babu, Classification of Intrinsically  
743 Disordered Regions and Proteins, *Chem Rev*, 114 (2014) 6589-6631.
- 744 [54] M.E. Oates, P. Romero, T. Ishida, M. Ghalwash, M.J. Mizianty, B. Xue, Z. Dosztanyi,  
745 V.N. Uversky, Z. Obradovic, L. Kurgan, D2P2: database of disordered protein predictions,  
746 *Nucleic acids research*, 41 (2012) D508-D516.
- 747 [55] M. Ponente, L. Campanini, R. Cuttano, A. Piunti, G.A. Delledonne, N. Coltella, R.  
748 Valsecchi, A. Villa, U. Cavallaro, L. Pattini, C. Doglioni, R. Bernardi, PML promotes  
749 metastasis of triple-negative breast cancer through transcriptional regulation of HIF1A target  
750 genes, *Jci Insight*, 2 (2017).
- 751 [56] L. Arreal, M. Piva, S. Fernandez, A. Revandkar, A. Schaub-Clerigue, J. Villanueva, A.  
752 Zabala-Letona, M. Pujana, I. Astobiza, A.R. Cortazar, I. Hermanova, L. Bozal-Basterra, A.  
753 Arruabarrena-Aristorena, J.R. Crespo, L. Valcarcel-Jimenez, P. Zuniga-Garcia, F. Canals, V.  
754 Torrano, R. Barrio, J.D. Sutherland, A. Alimonti, N. Martin-Martin, A. Carracedo, Targeting  
755 PML in triple negative breast cancer elicits growth suppression and senescence, *Cell Death*  
756 *Differ*, (2019).
- 757 [57] S.E. Birch, J.G. Kench, E. Takano, P. Chan, A.L. Chan, K. Chiam, A.S. Veillard, P.  
758 Stricker, S. Haupt, Y. Haupt, L. Horvath, S.B. Fox, Expression of E6AP and PML predicts  
759 for prostate cancer progression and cancer-specific death, *Annals of oncology : official*  
760 *journal of the European Society for Medical Oncology*, 25 (2014) 2392-2397.
- 761 [58] H.J. Kim, D.E. Song, S.Y. Lim, S.H. Lee, J.L. Kang, S.J. Lee, E.N. Benveniste, Y.H.  
762 Choi, Loss of the promyelocytic leukemia protein in gastric cancer: implications for IP-10  
763 expression and tumor-infiltrating lymphocytes, *PloS one*, 6 (2011) e26264.
- 764 [59] N. Datta, S. Islam, U. Chatterjee, S. Chatterjee, C.K. Panda, M.K. Ghosh, Promyelocytic  
765 Leukemia (PML) gene regulation: implication towards curbing oncogenesis, *Cell death &*  
766 *disease*, 10 (2019) 656.
- 767 [60] X. Cui, X. Jing, Q. Yi, C. Long, B. Tan, X. Li, X. Chen, Y. Huang, Z. Xiang, J. Tian, J.  
768 Zhu, Systematic analysis of gene expression alterations and clinical outcomes of STAT3 in  
769 cancer, *Oncotarget*, 9 (2018) 3198-3213.
- 770 [61] J.J. Qin, L. Yan, J. Zhang, W.D. Zhang, STAT3 as a potential therapeutic target in triple  
771 negative breast cancer: a systematic review, *J Exp Clin Canc Res*, 38 (2019).

772  
773

774



775 **Figure legends**

776 **Figure 1.** A schematic diagram summarizing selected online tools used in this study.

777 **Figure 2.** *GRINA* (Glutamate Ionotropic Receptor NMDA Type Subunit Associated Protein  
778 1) mRNA levels were analyzed in different types of cancer. (a) The mRNA expression of  
779 *GRINA* in various human cancers. The figure was retrieved from the Oncomine database.  
780 The cell number represents the dataset number that meets all the thresholds with the color  
781 blue for under-expression and color red for over-expression. Cell color is determined by the  
782 best gene rank percentile for the analyses within the cell. (b) The mRNA expression of  
783 *GRINA* in various human cancers. The figure was retrieved from the TCGA database using  
784 UCSC Xena.  $p$ -value  $< 0.05$  represents statistically significant. \* $p < 0.05$ ; \*\*  $p < 0.01$ ; \*\*\* $p$   
785  $< 0.001$ ; \*\*\*\* $p < 0.0001$ . (c) mRNA expression of *GRINA* was analyzed by RT-PCR using  
786 various cancer cell lines including breast (MCF7 and MDA-MB231), esophagus (SEG-1),  
787 colon (HCT116 and HT-29), liver (HepG2 and SNU475), blood (K562), lung (A549), and  
788 ovarian (SKOV3 and A2780), cancers. *GAPDH* was used as a loading control. The  
789 expression intensity of *GRINA* mRNA was analyzed by ImageJ software. The expression  
790 bands were cropped from the full gel with no apparent modification. The image of full gels  
791 is supplemented in supplementary information files under Supplementary Figure 1.

792 **Figure 3.** Expression of *GRINA* and patient survival were analysed in normal and cancerous  
793 breast tissue. (a and b) Fold-changes in *GRINA* levels in breast cancer, shown as box plots  
794 comparing *GRINA* expression in normal ( $n = 3$ , left plot) vs. lobular breast carcinoma tissue  
795 ( $n = 21$ , right plot) (a) and in normal ( $n = 3$ , left plot) vs. invasive ductal breast carcinoma  
796 tissue ( $n = 38$ , right plot) (b). Data derived from the Oncomine database. (c) *GRINA* mRNA  
797 levels were analyzed in breast cancer ( $n = 1097$ ) and the normal ( $n = 114$ ) tissues based on  
798 data from The Cancer Genome Atlas (TCGA) database using ULCAN web.  
799 (d) *GRINA* levels in BRCA patients (subclass) based on the TCGA database using ULCAN

800 web. (e) Methylation levels in *GRINA* promoters were analysed in breast cancer based on  
801 The Cancer Genome Atlas (TCGA) data and ULCAN. (f) Mutation and copy number  
802 alteration frequencies of *GRINA* were derived from cBioPortal using TCGA-BRCA data. (g)  
803 *GRINA* protein expression data from immunohistochemistry staining in normal and breast  
804 carcinomas was derived from the Human Protein Atlas. (h) Survival curves comparing breast  
805 cancer patients with high (red) and low (blue) *GRINA* levels based on the R2: Kaplan Meier  
806 Scanner (Pro) database. Survival curve analysis was conducted using a threshold logrank test  
807 using scan modulus of expression value.  $p$ -value  $< 0.05$  represents statistically significant.

808 **Figure 4.** *GRINA* expression patterns and patient survival analysis were performed for  
809 colorectal cancers. (a and b) Fold-changes in *GRINA* in colorectal cancers were identified  
810 by our analyses, shown as a box plot comparing *GRINA* levels in normal ( $n = 10$ , left plot)  
811 vs. colon carcinoma tissues ( $n = 5$ , right plot) (a) and normal ( $n = 65$ , left plot) vs. rectal  
812 adenocarcinoma tissue ( $n = 65$ , right plot) (b) based on data from the Oncomine database.  
813 (c) *GRINA* mRNA levels in colon adenocarcinoma were obtained from The Cancer Genome  
814 Atlas (TCGA) database through ULCAN. (d) *GRINA* expression in COAD patients  
815 (subclass) obtained from the TCGA database. (e) Methylation of *GRINA* gene promoters was  
816 analyzed in colon cancer based on data from The Cancer Genome Atlas (TCGA) database  
817 obtained via ULCAN. (f) Copy number alteration frequencies of the *GRINA* gene were  
818 derived from the cBioPortal web using TCGA-COAD data. (g) Protein expression of  
819 *GRINA*, as demonstrated by immunohistochemistry staining in normal tissue and colon  
820 carcinomas obtained from the Human Protein Atlas. (h) Survival curves for colon cancer  
821 patients with high (red) and low (blue) *GRINA* levels in colon cancer based on the R2:

822 Kaplan Meier Scanner (Pro) database. Survival curve analysis was conducted using a  
823 threshold logrank test using scan modus of expression value.  $p$ -value  $< 0.05$  represents  
824 statistically significant.

825 **Figure 5.** *GRINA* expression patterns and patient survival were analysed in gastric cancers.  
826 **(a and b)** Fold-changes of *GRINA* in gastric cancers is shown as box plots either comparing  
827 *GRINA* levels in normal ( $n = 31$ , left plot) and gastric intestinal-type adenocarcinoma tissues  
828 ( $n = 26$ , right plot) **(a)** or comparison normal ( $n = 31$ , left plot) and gastric mixed  
829 adenocarcinoma tissues ( $n = 4$ , right plot) **(b)** based on the Oncomine database. **(c)**  
830 *GRINA* mRNA levels in stomach carcinomas was obtained from The Cancer Genome Atlas  
831 (TCGA) database through ULCAN. **(d)** *GRINA* gene expression in STAD patients (subclass)  
832 was obtained from the TCGA database. **(e)** Methylation of *GRINA* gene promoters was  
833 analyzed in STAD tumors (red plot) and normal (blue plot) tissues based on TCGA database  
834 information and was generated using ULCAN. **(f)** Mutation and copy number alteration  
835 frequencies of the *GRINA* gene were derived from the cBioPortal web using TCGA-STAD  
836 data. **(g)** *GRINA* protein expression based on immunohistochemistry staining in normal and  
837 stomach carcinoma tissues was derived from the Human Protein Atlas. **(h)** Survival curves  
838 or stomach cancer patients were plotted with high (red) and low (blue) *GRINA* levels based  
839 on the R2: Kaplan Meier Scanner (Pro) database. Survival curve analysis was conducted  
840 using a threshold logrank test using scan modus of expression value.  $p$ -value  $< 0.05$   
841 represents statistically significant.

842 **Figure 6.** *GRINA* expression patterns and patient survival were analyzed for prostate cancer.  
843 **(a and b)** The fold-changes in *GRINA* levels in prostate cancers are shown as box plots  
844 comparing levels between normal ( $n = 23$ , left plot) and prostate carcinoma tissues ( $n = 30$ ,  
845 right plot) **(a)** and between normal ( $n = 23$ , left plot) and prostatic intraepithelial neoplasia  
846 tissues ( $n = 13$ , right plot) **(b)** based on data derived from Oncomine. **(c)** *GRINA* mRNA  
847 levels was analyzed in prostate adenocarcinomas from The Cancer Genome Atlas (TCGA)  
848 database via ULCAN web. **(d)** *GRINA* expression levels was examined in PRAD patients  
849 (Gleason score) from the TCGA database. **(e)** Methylation of *GRINA* gene was analyzed in  
850 prostate cancer using The Cancer Genome Atlas (TCGA) database through the ULCAN web.  
851 **(f)** Copy number alteration frequency of the *GRINA* gene was derived from the cBioPortal  
852 web using TCGA-PRAD data. **(g)** Protein expression data for *GRINA* was obtained via  
853 immunohistochemistry staining in normal and prostate carcinoma tissues from the Human  
854 Protein Atlas. **(h)** Survival curves comparing patients with prostate cancer having high (red)  
855 and low (blue) *GRINA* levels, plotted using data from the R2: Kaplan Meier Scanner (Pro)  
856 database. Survival curve analysis was conducted using a threshold logrank test using scan  
857 modus of expression value.  $p$ -value  $< 0.05$  represents statistically significant.

858 **Figure 7.** Construction of a *GRINA*-miRNA-mRNA network. **(a)** *GRINA* mRNA-targeting  
859 miRNAs were identified using miRSystem and starBase v3.0 databases. Common miRNAs  
860 were identified using list of miRNAs derived from miRSystem and Starbase v3.0 via Venn  
861 diagram. **(b)** A total of common 18 *GRINA* mRNA-targeting miRNAs were used to construct  
862 the *GRINA*-miRNA-mRNA network using the starBase v3.0 database. **(c)** Expression of

863 miR-411-5p, miR-654-5p, and miR-874-3p was analysed in breast, colon, prostate, and  
864 stomach cancer tissues and normal tissue controls as determined using starBase v3.0. (d)  
865 Schematic of the in-silico analysis of the predicted binding sites showing that miR-411, miR-  
866 654, and miR-874 bind to the 3' UTR region of GRINA mRNA. The binding site of GRINA  
867 3'UTR and miRNAs were derived from Starbase v3.0 web. The predicted consequential  
868 pairing between the target region (position chr8; 145067249–145067271 of GRINA 3' UTR)  
869 and the seed sequence of miR-411 is shown (i). The predicted consequential pairing between  
870 the target region (position chr8; 145067297–145067303 of GRINA 3' UTR) and the seed  
871 sequence of miR-654 is shown (ii). The predicted consequential pairing between the target  
872 region (position chr8; 145067491–145067496 of GRINA 3' UTR) and the seed sequence of  
873 miR-874 is shown (iii). *p*-value < 0.05 represents statistically significant.

874 **Figure 8.** Pathway enrichment analysis for genes positively and negatively co-expressed  
875 with GRINA in breast, colon, stomach, and prostate cancer. (a) Venn diagram of genes  
876 positively co-expressed with GRINA based on R2: Genomics Analysis and Visualization  
877 Platform databases for breast, colon, stomach, and prostate cancer, using InteractiVenn. (b  
878 and c) Pathway (Reactome and KEGG) enrichment analysis was performed using Enrichr  
879 for the 83 genes positively co-expressed with GRINA in breast, colon, stomach, and prostate  
880 cancer. (d) The Venn diagram of genes negatively co-expressed with GRINA based on R2:  
881 Genomics Analysis and Visualization Platform databases for breast, colon, stomach, and  
882 prostate cancer using InteractiVenn web. (e and f) Pathway (KEGG and Reactome)

883 enrichment analysis was performed using Enrichr web for the 21 genes negatively co-  
884 expressed with GRINA in breast, colon, stomach, and prostate cancer.

885 **Figure 9.** Subnetwork of transcription factors, intermediate proteins, and protein kinases.

886 Expression2Kinases analysis of the (a) positively- and (b) negatively co-expressed genes

887 indicated the most enriched TFs and kinase upstream of co-expressed genes occurring in

888 multiple cancers based on a combination of P-values and  $z$ -scores. Node size reflects

889 connectivity, and color indicates transcription factors in red, intermediate proteins in orange,

890 and kinases in blue.

**Methylation analysis**

- UALCAN web (TCGA)

**Protein expression analysis**

- Human Protein Atlas

**miRNA analysis**

- miRSystem
- starBase v3.0

**GO and pathway analysis**

- Enrichr web

**Prognostic and Clinicopathological role of GRINA**

**mRNA Expression analysis**

- Oncomine database
- UCSC Xena (TCGA)
- UALCAN web (TCGA)

**CNAs analysis**

- cBioPortal (TCGA)

**Prognostic analysis**

- R2: Kaplan Meier Scanner (Pro)
- SurvExpress web

**Co-Expression analysis**

- R2: Genomics Analysis and Visualization Platform databases

**Transcription factor, intermediate protein and protein kinase**

- Expression2Kinases web

**a**

Expression of *GRINA*

| Analysis Type by Cancer     | Cancer Vs. Normal |
|-----------------------------|-------------------|
| Bladder Cancer              |                   |
| Brain & CNS Cancer          |                   |
| Breast Cancer               | 2                 |
| Cervical Cancer             |                   |
| Colorectal Cancer           | 3                 |
| Esophageal Cancer           | 2                 |
| Gastric Cancer              | 3                 |
| Head & Neck Cancer          | 1                 |
| Kidney Cancer               |                   |
| Leukemia                    |                   |
| Liver Cancer                |                   |
| Lung Cancer                 | 1                 |
| Lymphoma                    | 2                 |
| Melanoma                    | 2                 |
| Myeloma                     |                   |
| Other cancer                |                   |
| Ovarian Cancer              | 1                 |
| Pancreatic Cancer           |                   |
| Prostate Cancer             | 2                 |
| Sarcoma                     | 1                 |
| Significant Unique Analyses | 16 4              |
| Total Unique Analyses       | 415               |

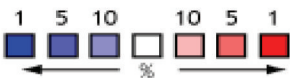

Cell color is determined by the best gene rank percentile for the analyses within the cell.

NOTE: An analysis may be counted in more than one cancer type.

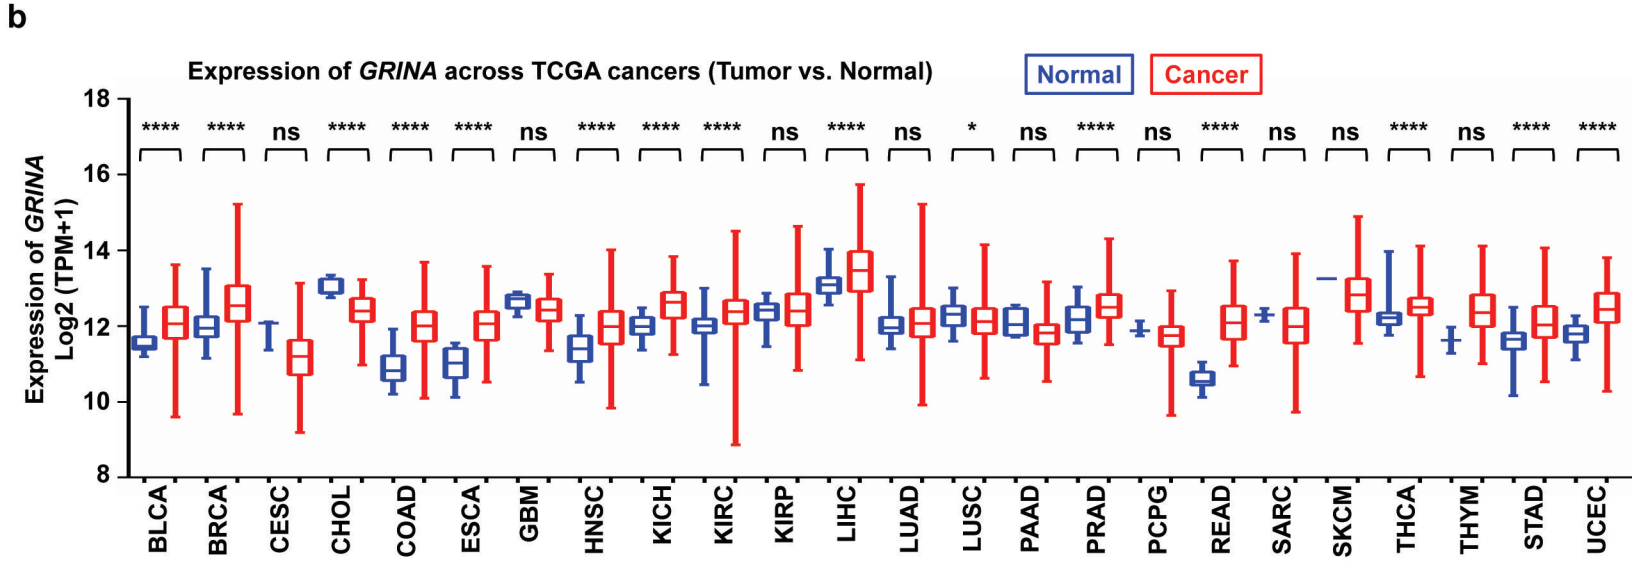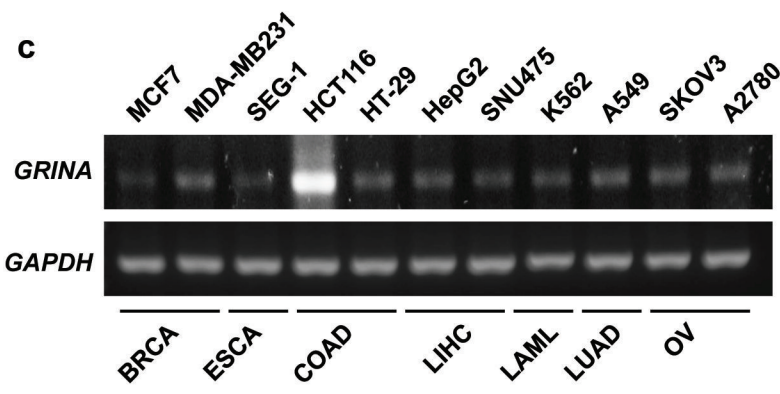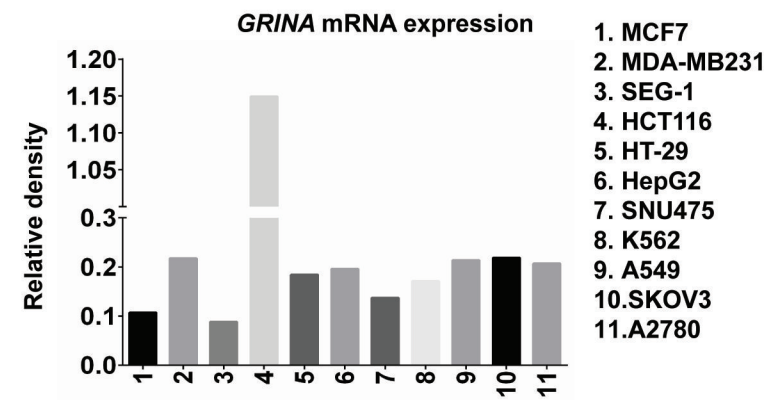



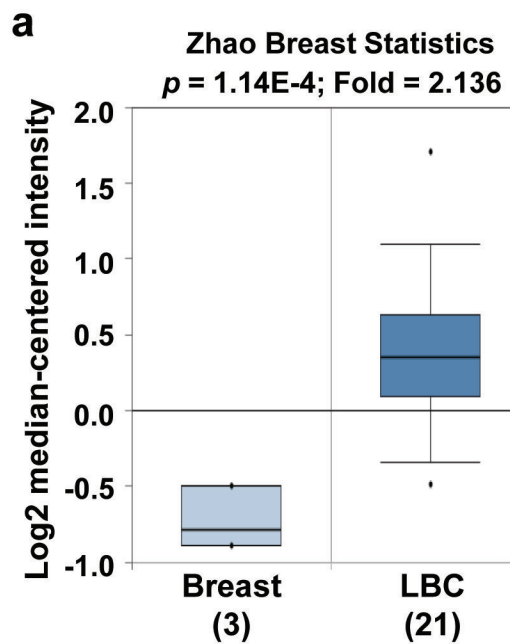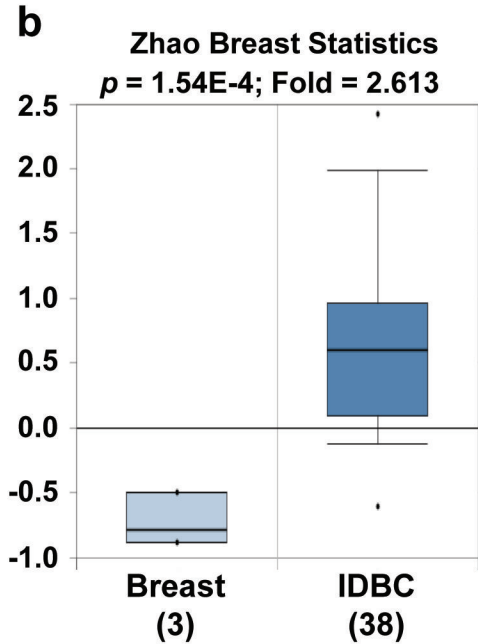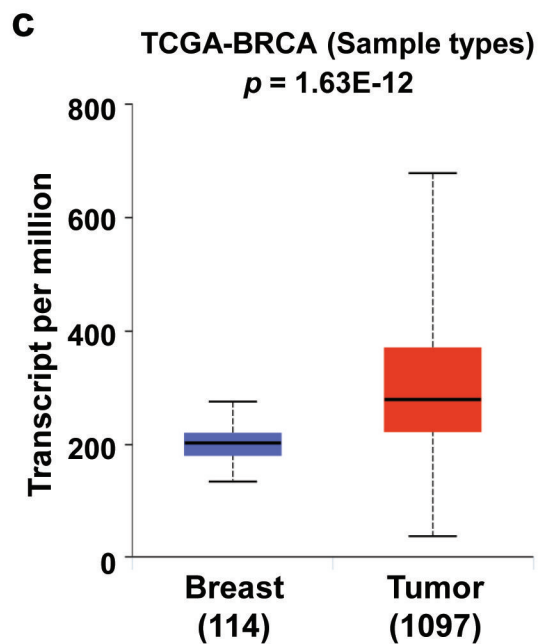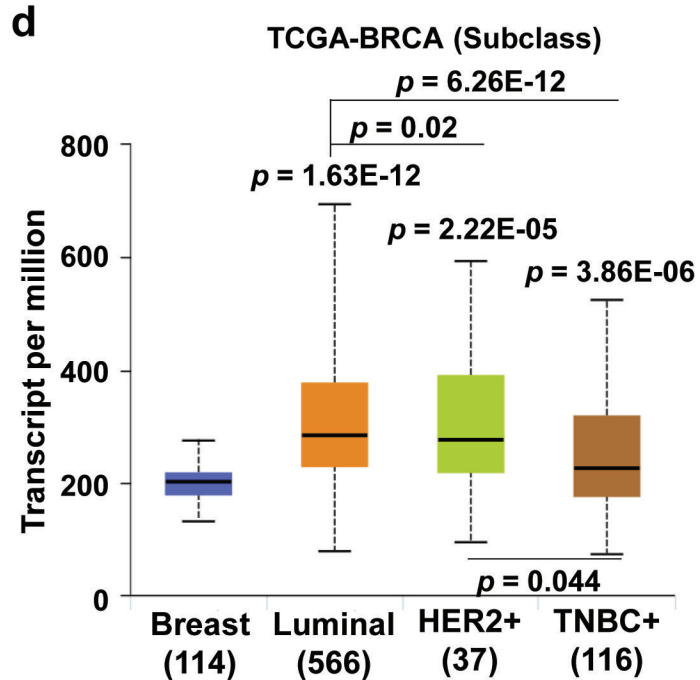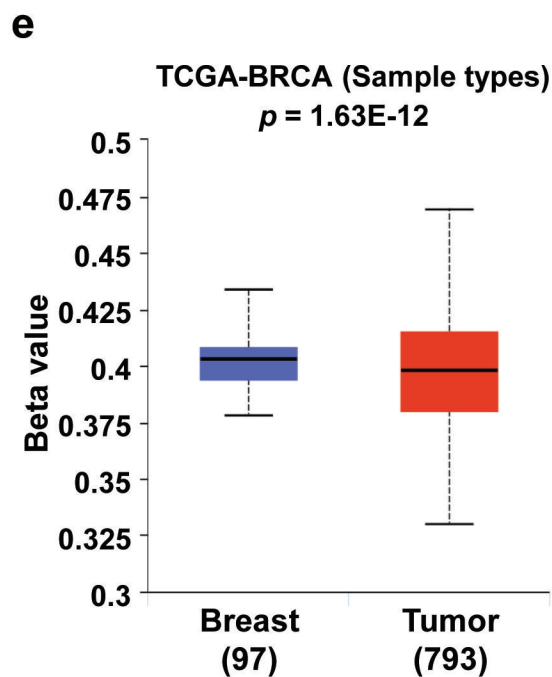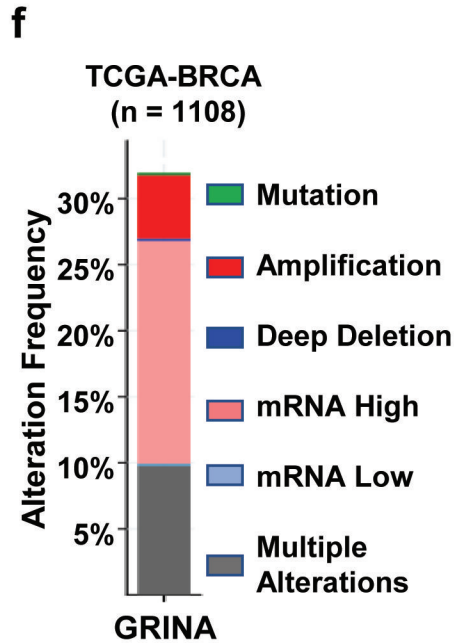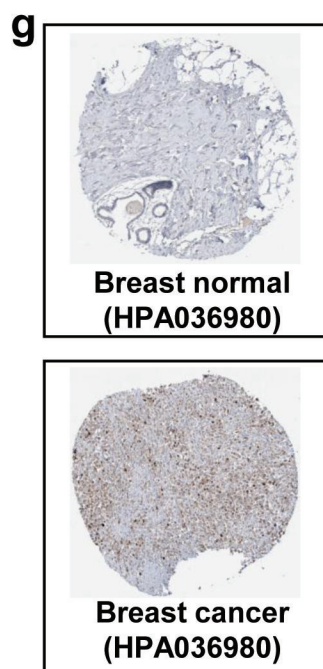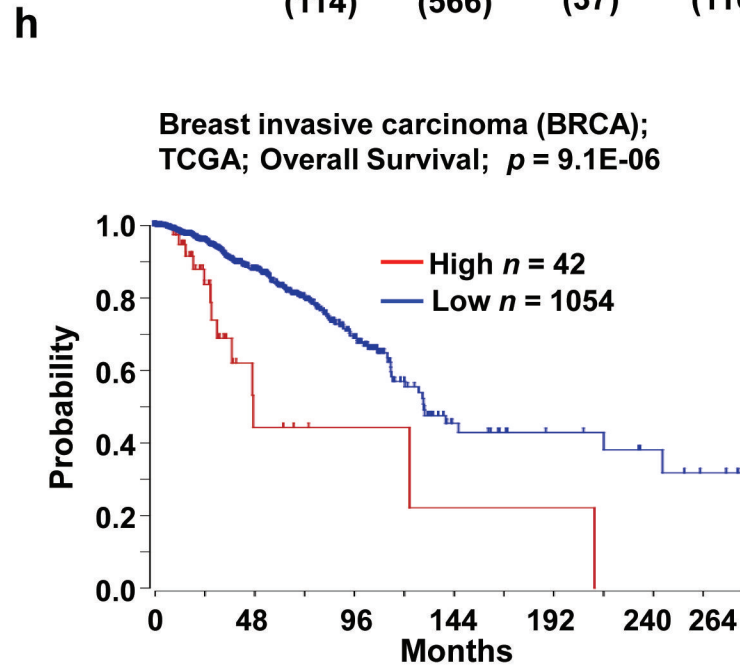

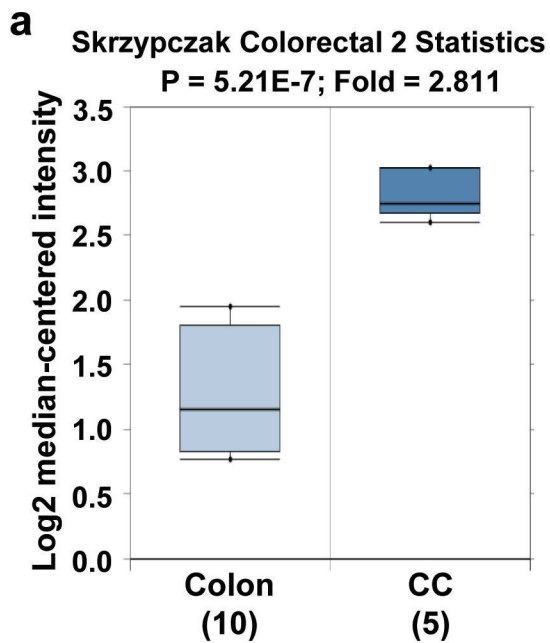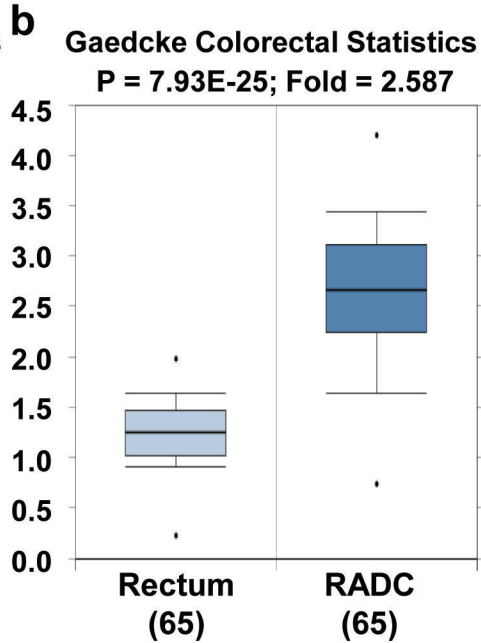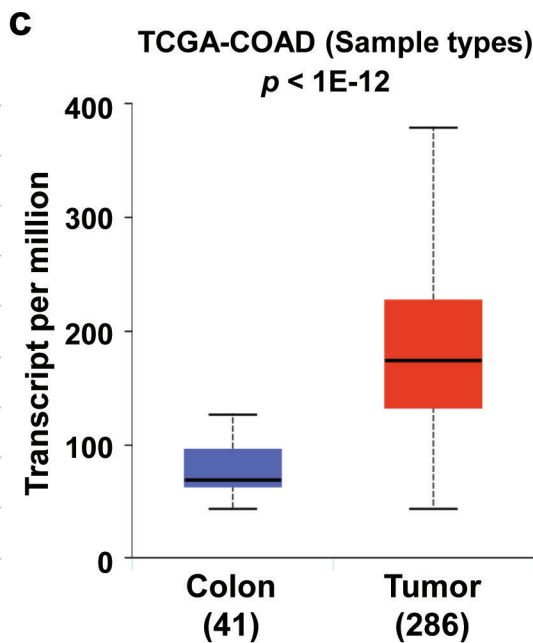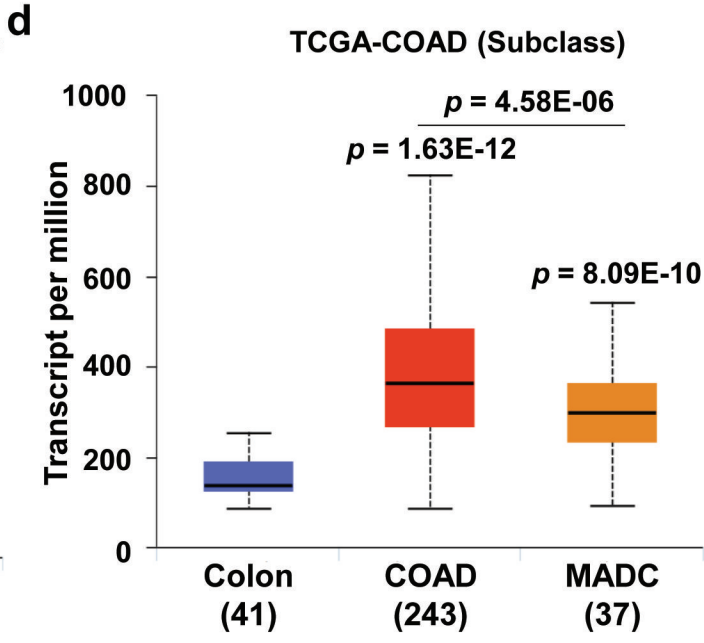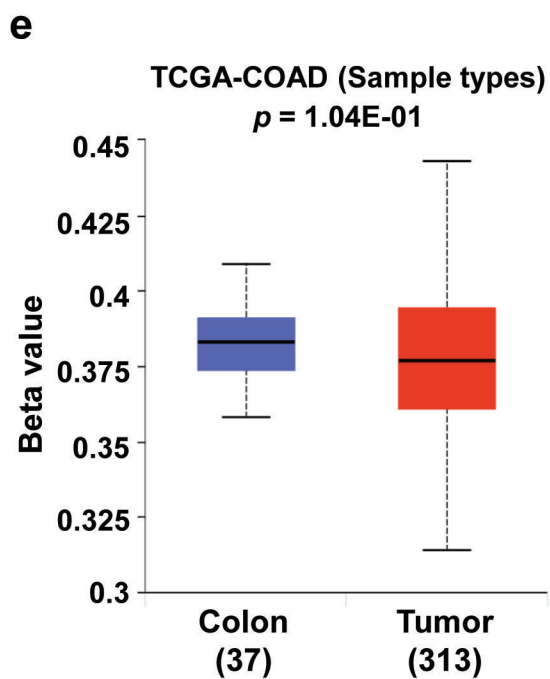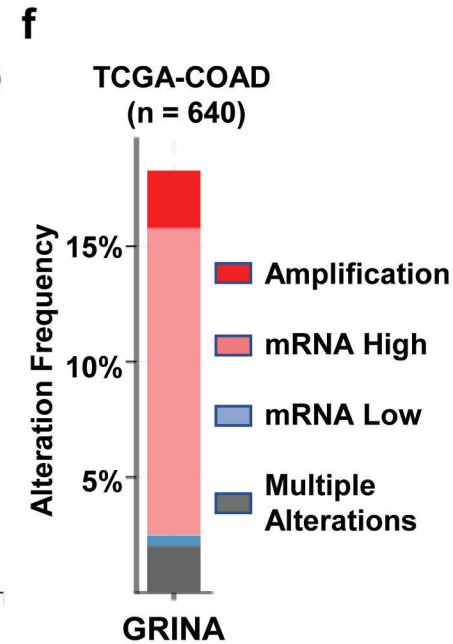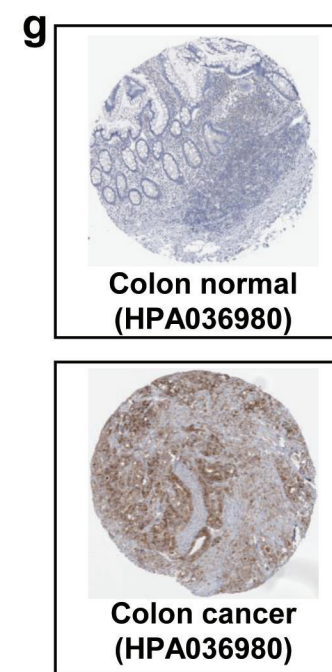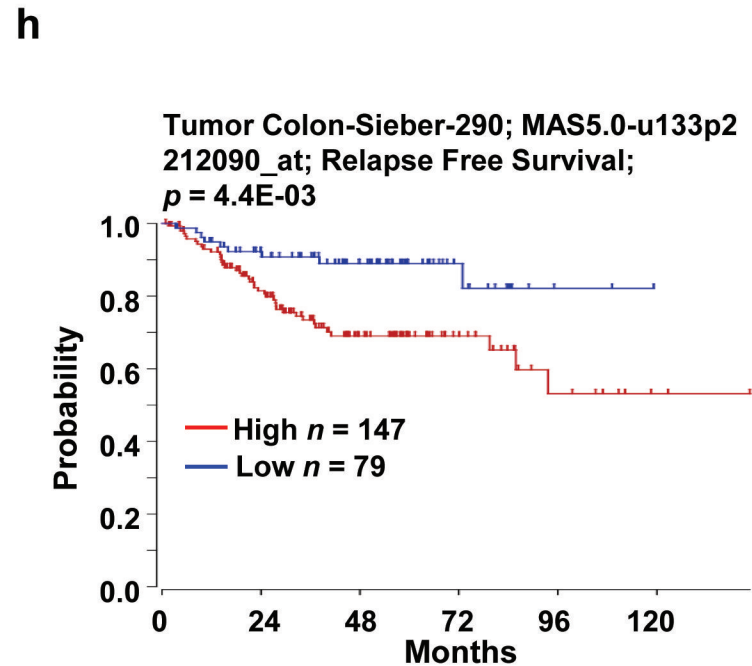

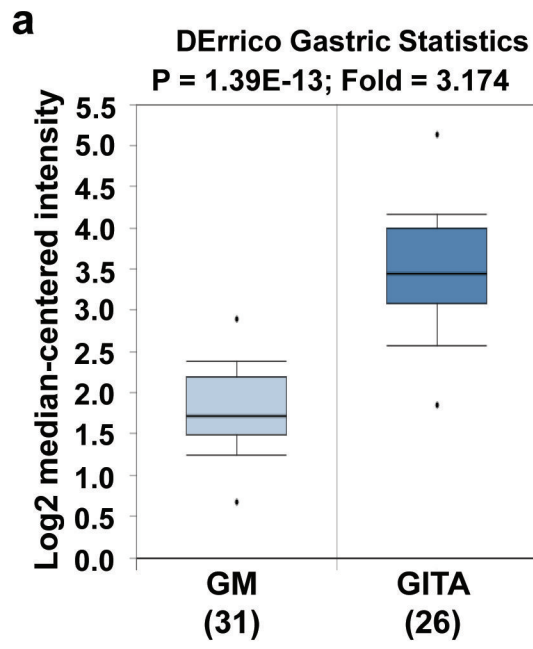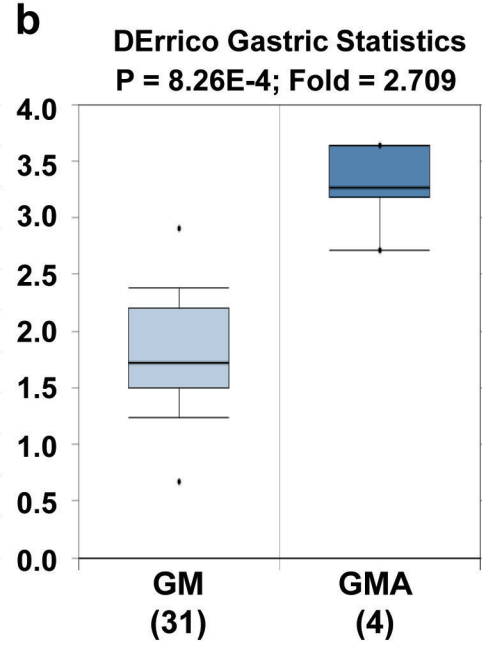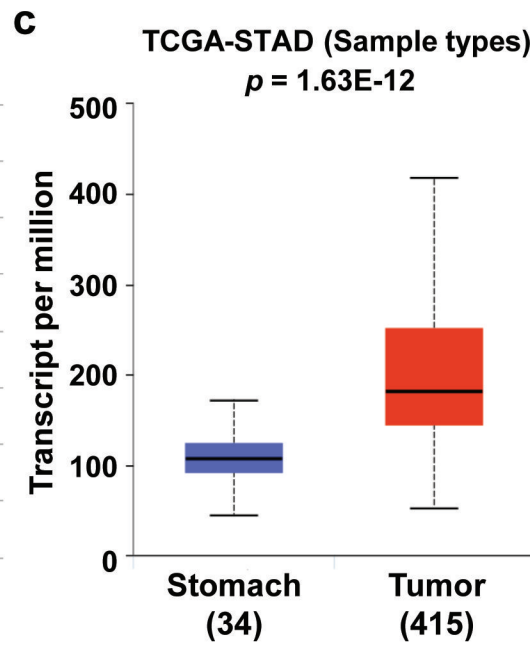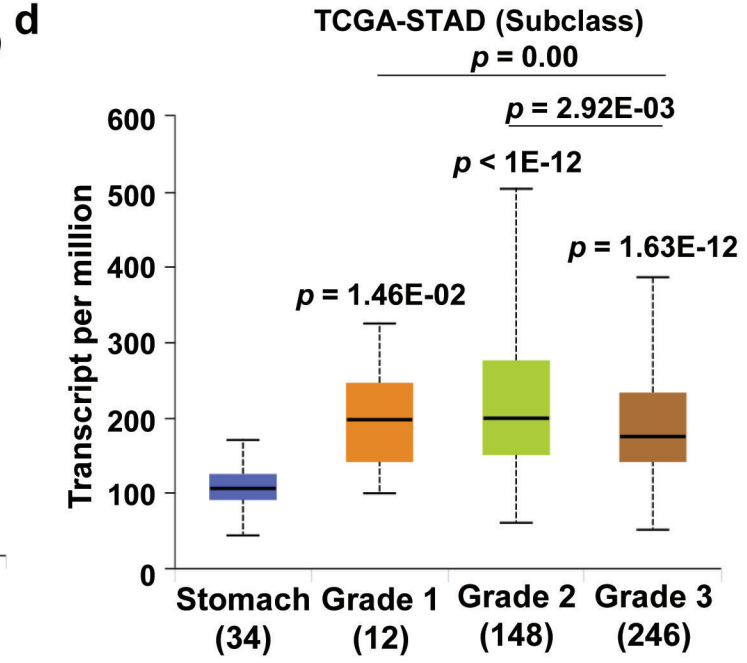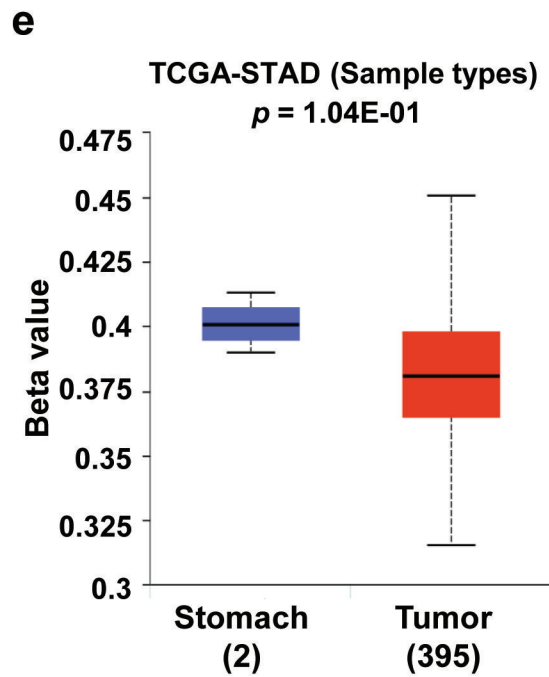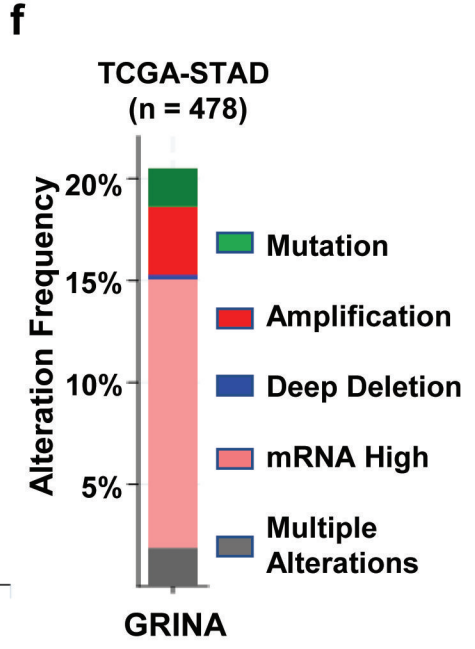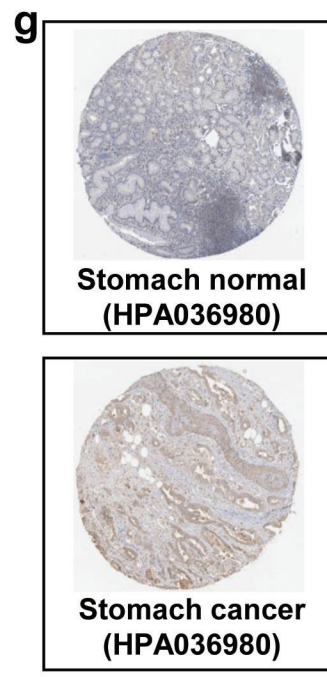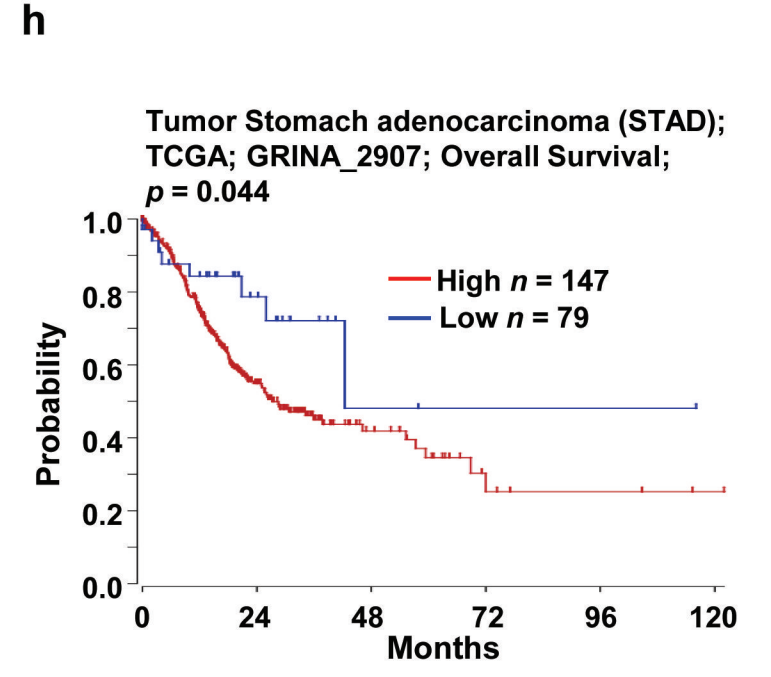

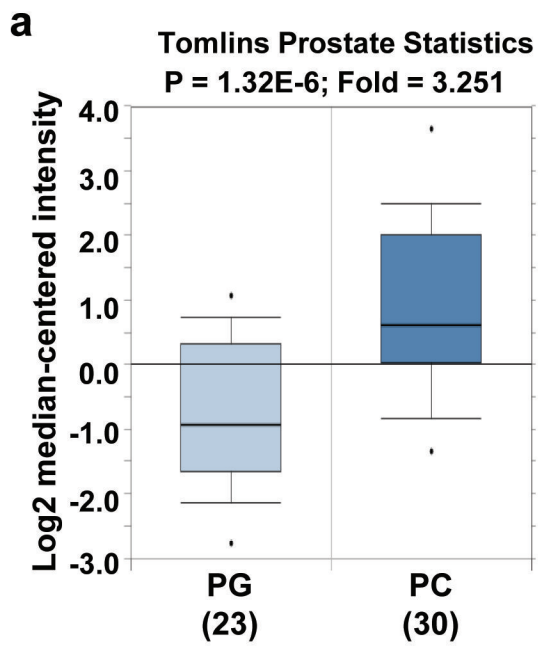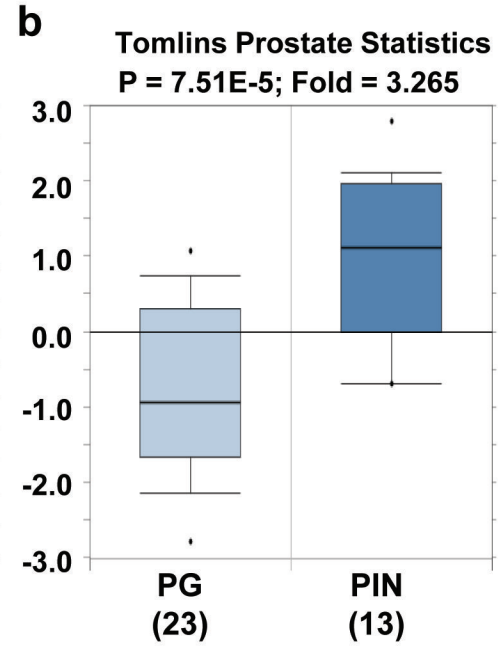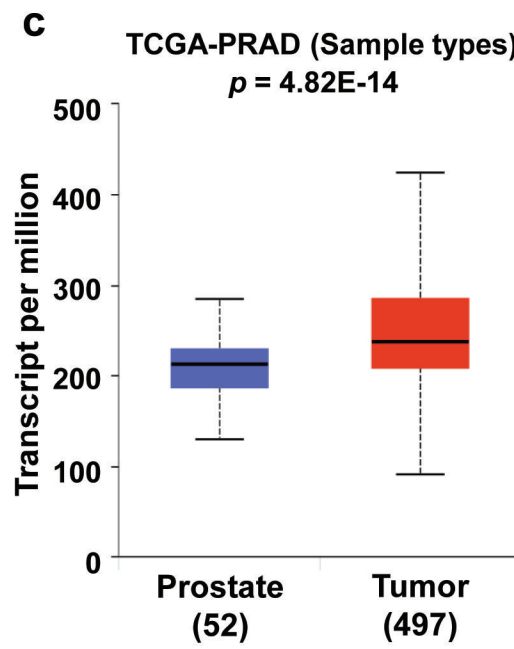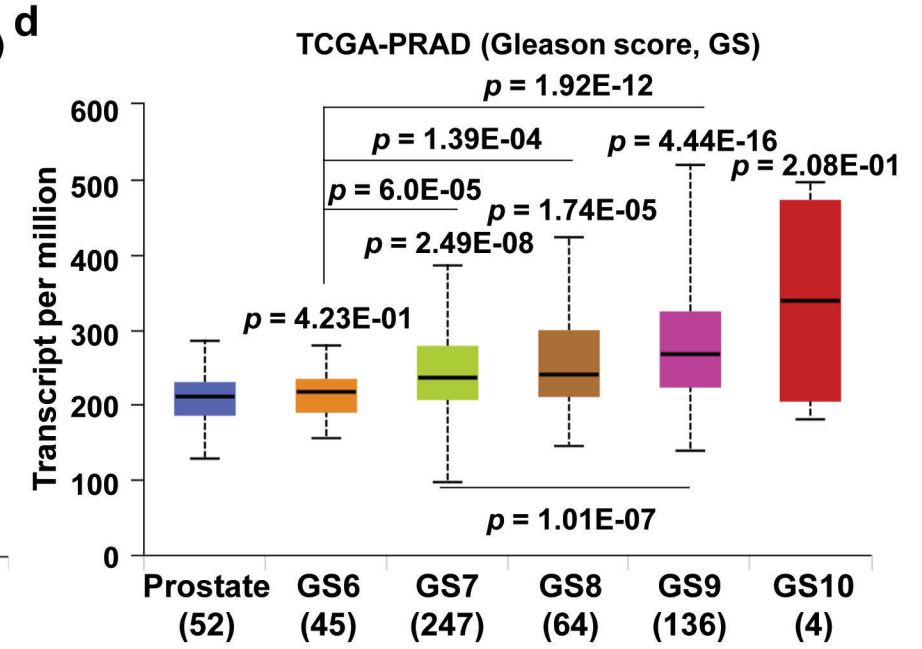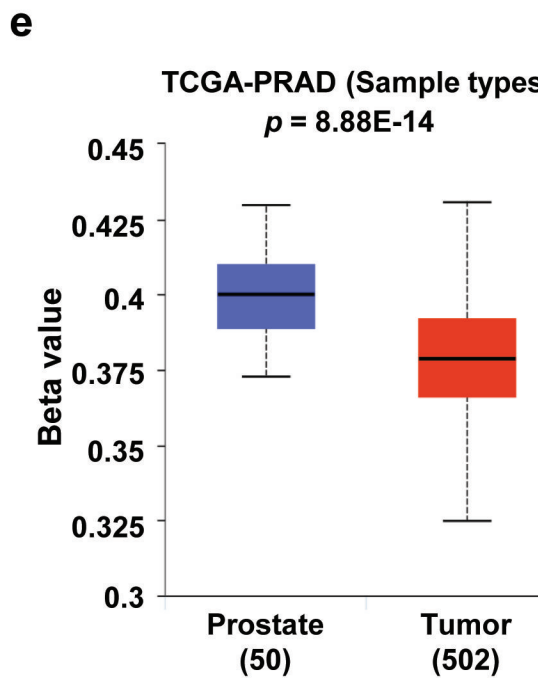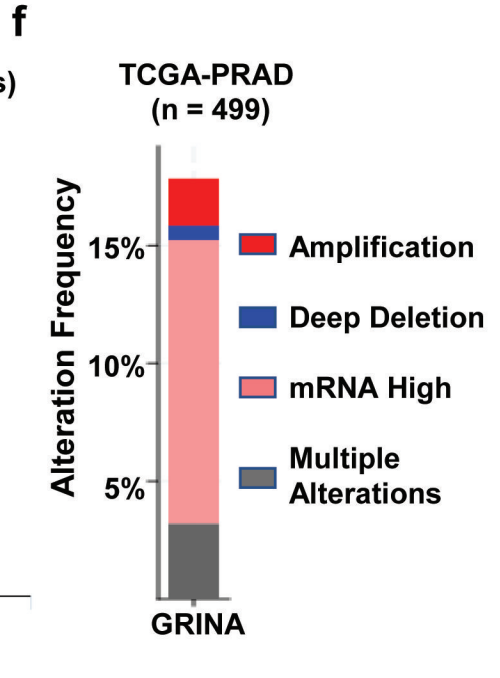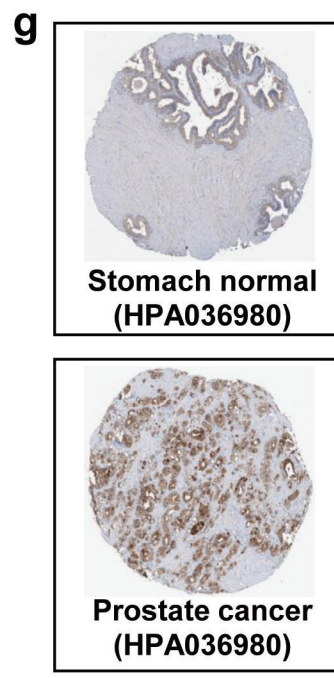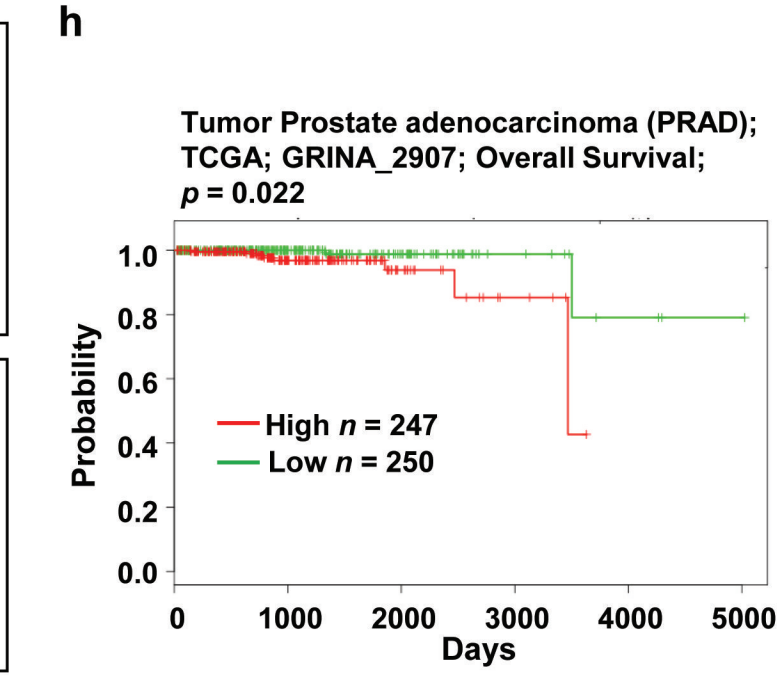

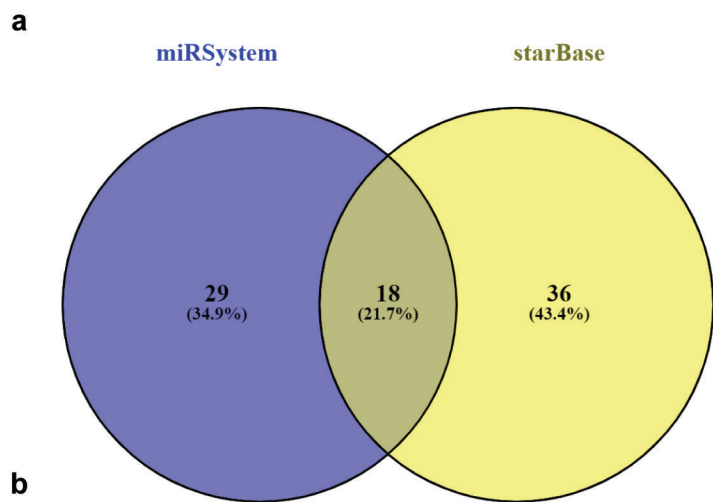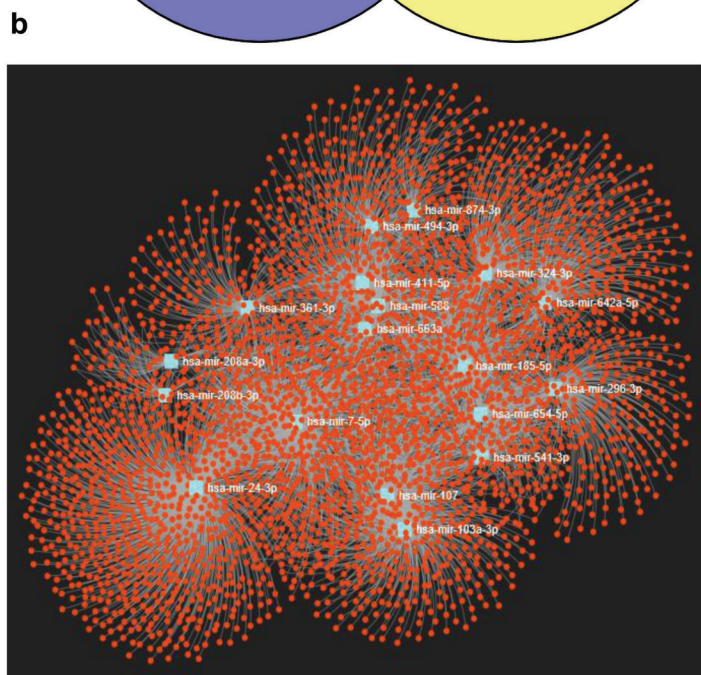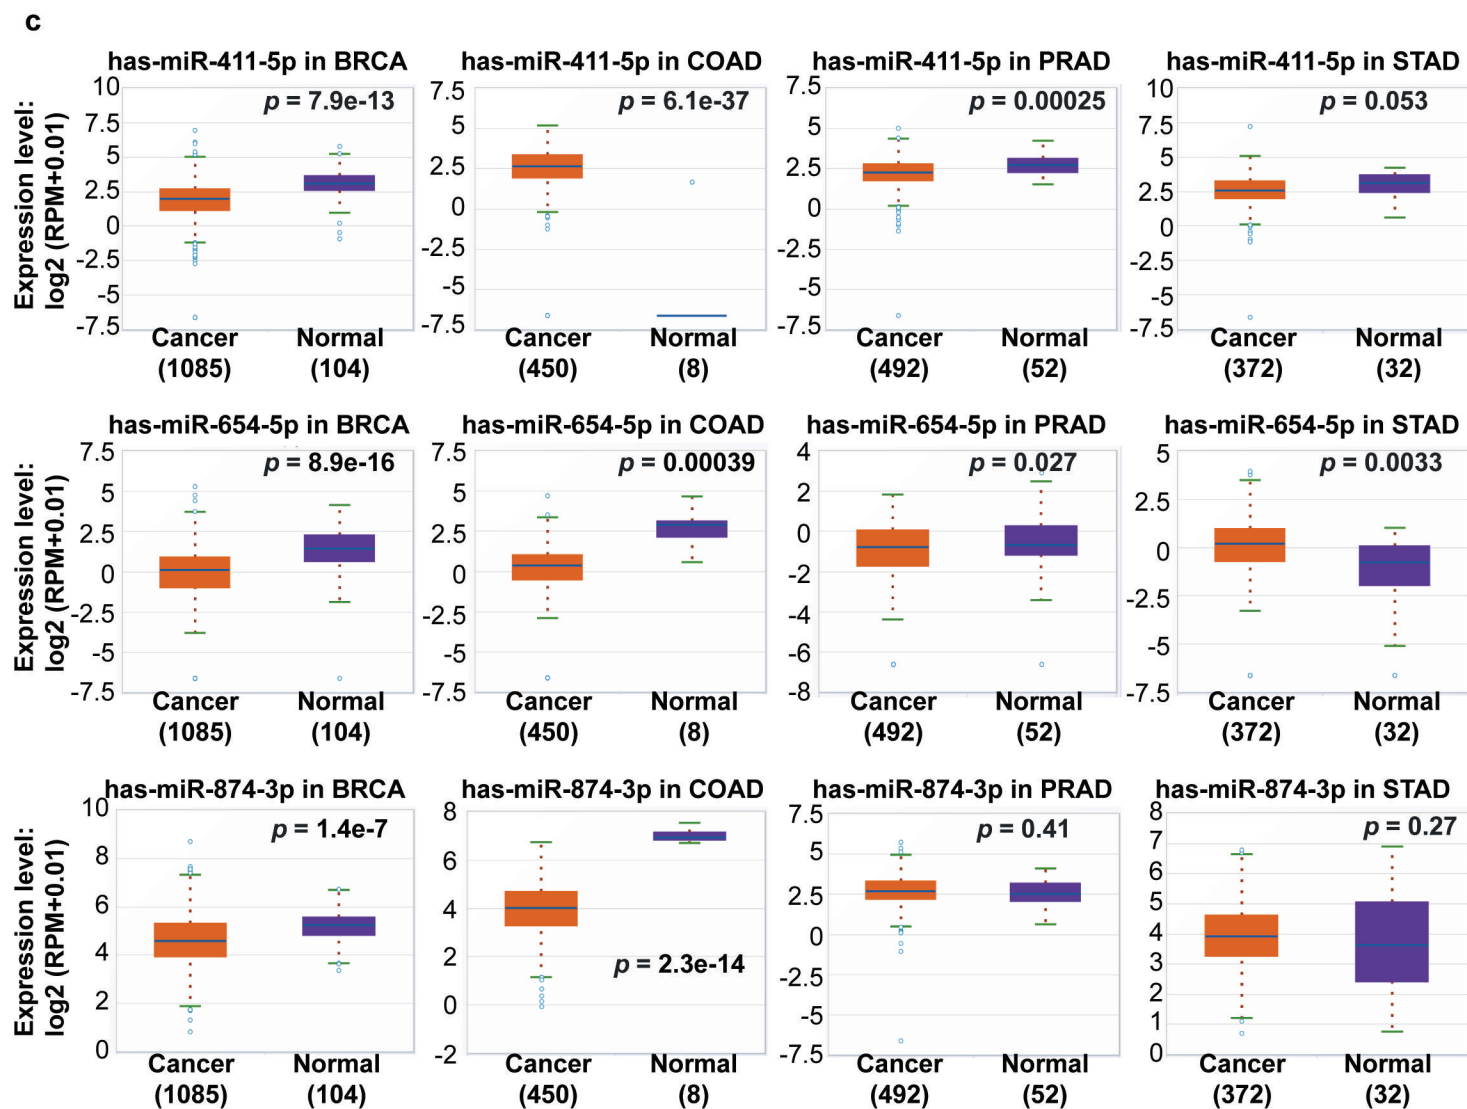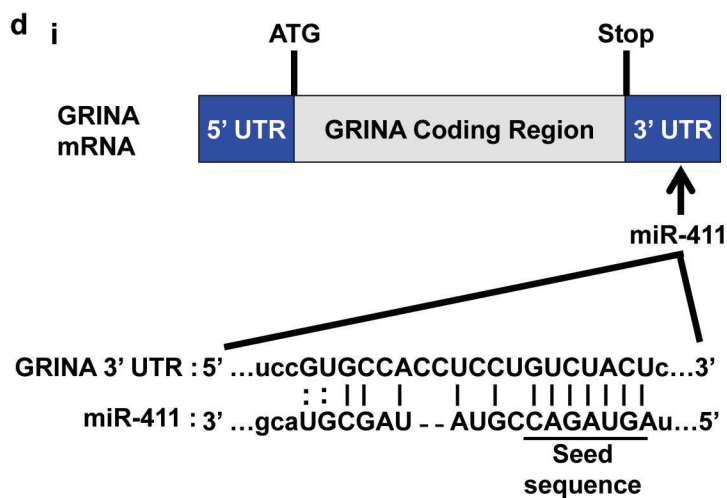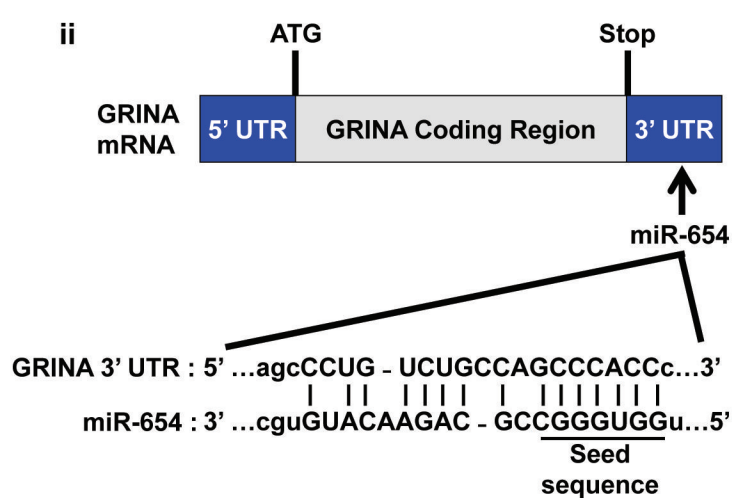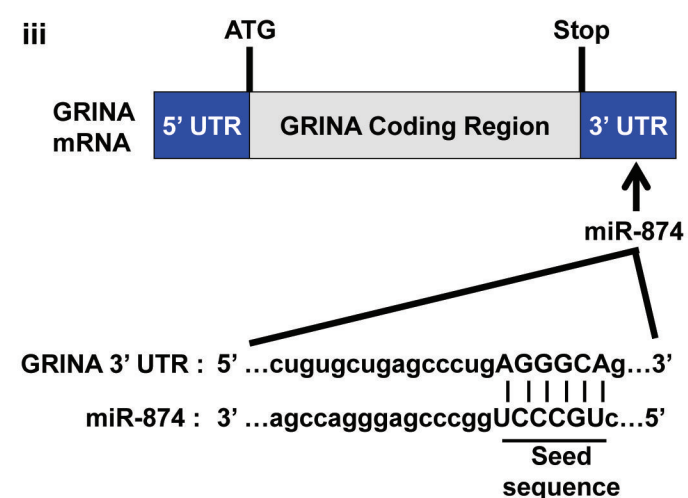

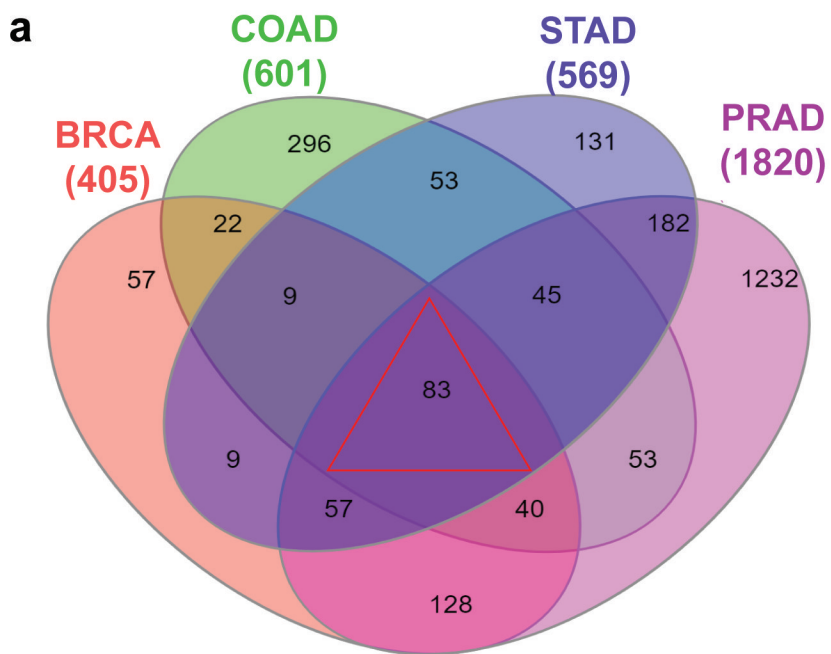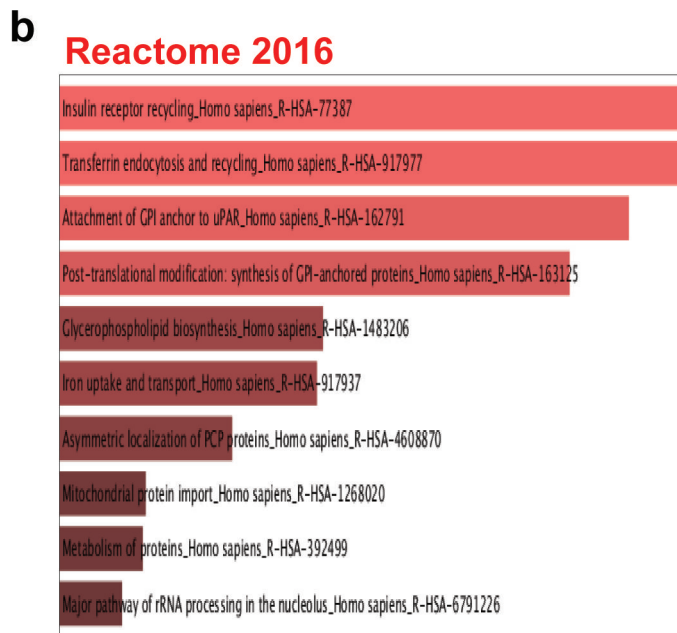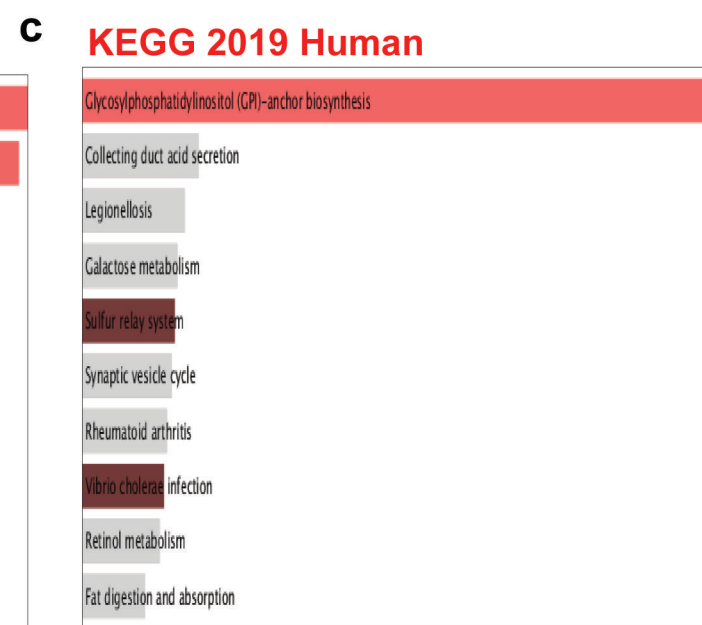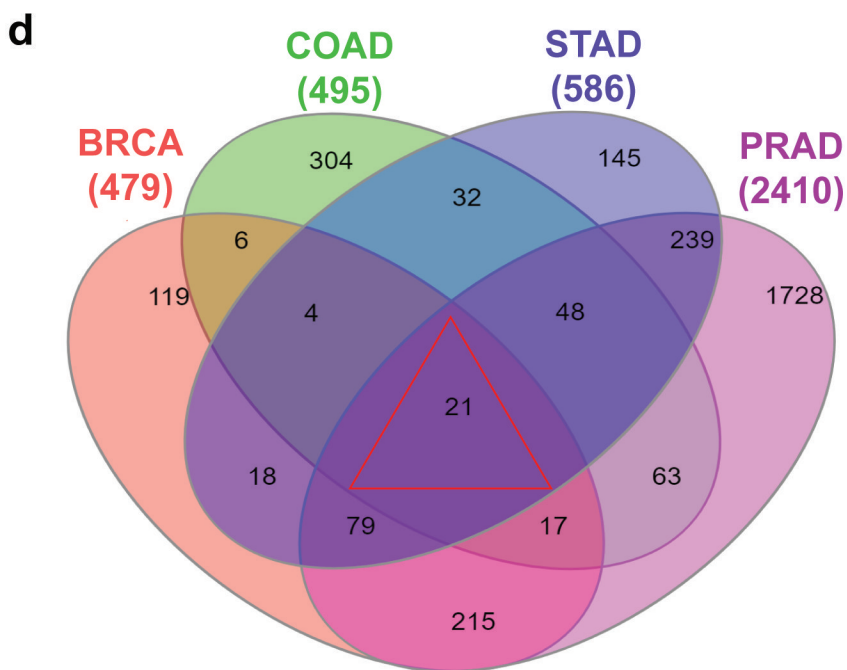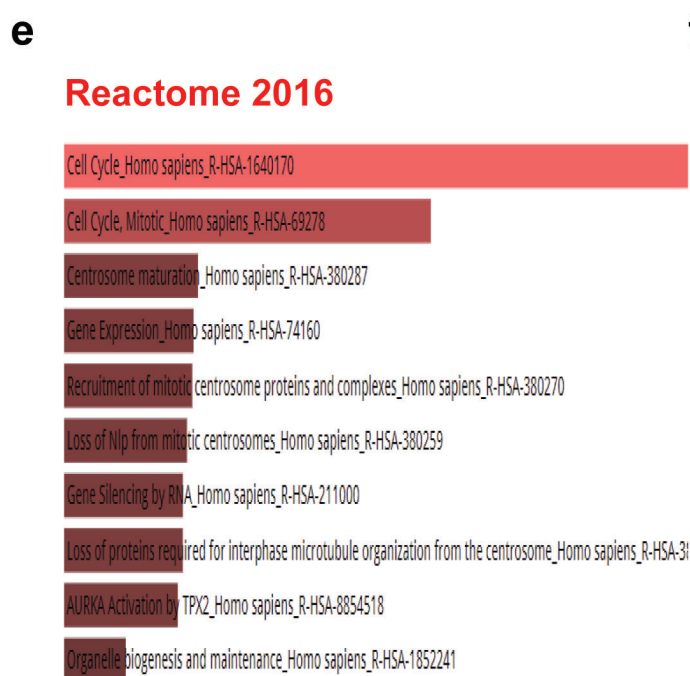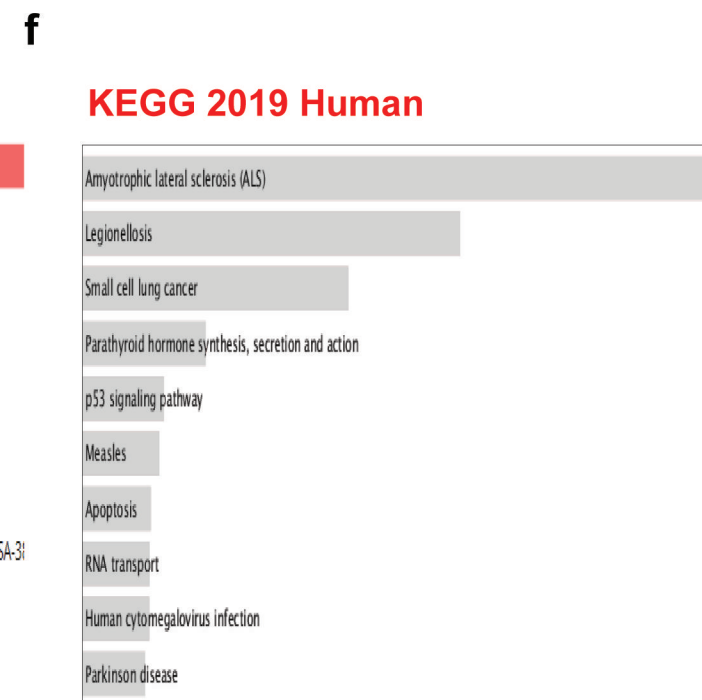

**a****eXpression2Kinases Network (Genes positively co-expressed with GRINA)**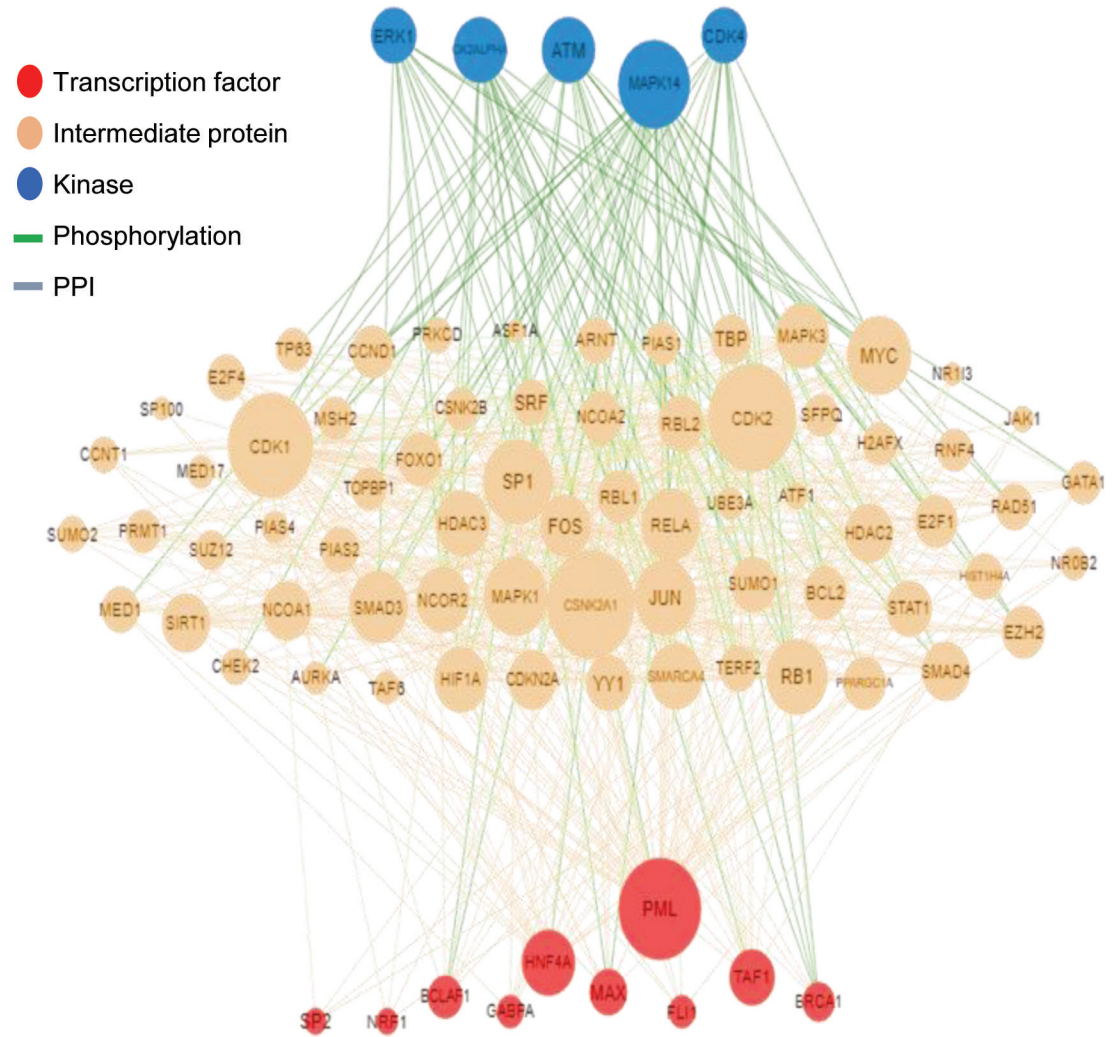**b****eXpression2Kinases Network (Genes negatively co-expressed with GRINA)**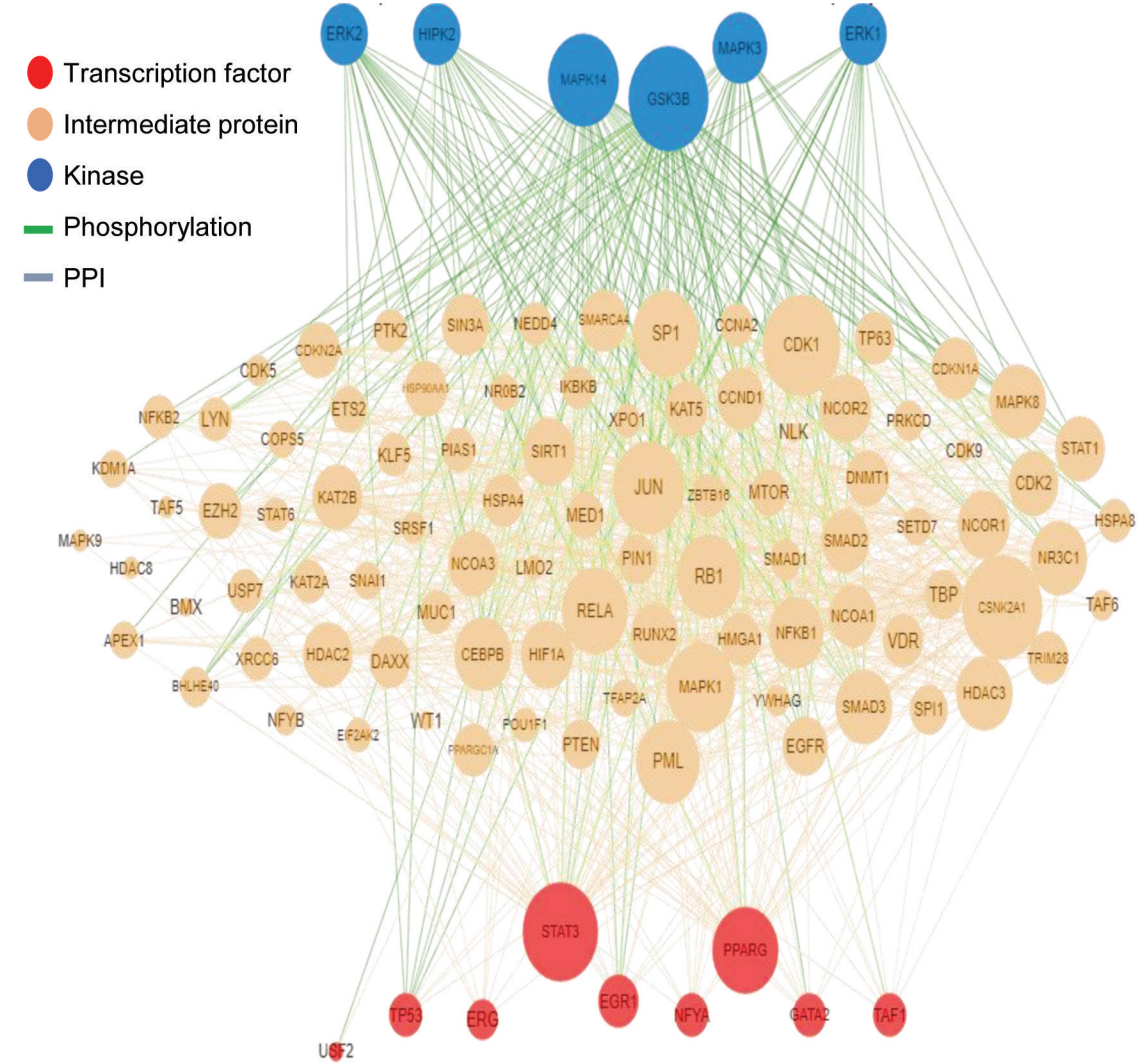

1 **Supplementary Information**

2 **Expression of GRINA Correlates with Prognosis in Human Cancers: A Pan-cancer Analysis**

3 **S. M. Riazul Islam**<sup>1, †</sup>, **Subbroto Kumar Saha**<sup>2, 3, †, \*</sup>, **Shaker El-Sappagh**<sup>4</sup>, **Faisal Tariq**<sup>5</sup>, **Joydeep Das**<sup>6</sup>, **Muhammad Afzal**<sup>7</sup>, and  
4 **Ssang-Goo Cho**<sup>2, \*</sup>

5 <sup>1</sup> Department of Computer Science and Engineering, Sejong University, 209 Neungdong-ro, Gwangjin-gu, Seoul, 05006, Republic of Korea;  
6 riaz@sejong.ac.kr (S.M.R.I)

7 <sup>2</sup> Department of Stem Cell and Regenerative Biotechnology, Konkuk University, 120 Neungdong-Ro, Seoul 05029, Republic of Korea;  
8 subbroto@konkuk.ac.kr (S.K.S.).

9 <sup>3</sup> Department of Biochemistry and Molecular Medicine, University of California at Davis, School of Medicine, Sacramento, California 95817,  
10 USA

11 <sup>4</sup> Centro Singular de Investigación en Tecnoloxías Intelixentes (CiTIUS), Universidade de Santiago de Compostela, 15782, Santiago de  
12 Compostela, Spain; shaker.elsappagh@usc.es (S.E.S.)

13 <sup>5</sup> James Watt School of Engineering, University of Glasgow, Glasgow G12 8QQ, United Kingdom; Faisal.Tariq@glasgow.ac.uk (F.T.)

14 <sup>6</sup> School of Chemistry, Shoolini University of Biotechnology and Management Sciences, Bajhol, Sultanpur, Solan – 173229 (HP), India;  
15 jdchem83@gmail.com (J.D.)

16 <sup>7</sup> Department of Software, Sejong University, Seoul 05006, South Korea; mafzal@sejong.ac.kr (M.A.)

17 \* Correspondence: sksaha@ucdavis.edu (S.K.S.); ssangoo@konkuk.ac.kr (S.-G.C.); Tel.: +1 (410) 413-0532 (S.K.S.); Tel.: +82-2-450-4207  
18 (S.-G.C.); Fax: +82-2-444-4207 (S.-G.C.)

19 † These authors contributed equally to this work: S.M.R. Islam and S.K. Saha (co-first authors).

20



21 **Supplementary Table 1.** Changes in GRINA expression at the transcriptional level between different types of cancer and normal tissues  
 22 (Oncomine Database).

| Cancer type   | Dataset      | Normal (Cases)                    | Tumour (Cases)                                           | Fold change | t-Test  | p-value  | Rank (%) | Reporter          | PMID     | GEO Accession |
|---------------|--------------|-----------------------------------|----------------------------------------------------------|-------------|---------|----------|----------|-------------------|----------|---------------|
| Breast        | Zhao         | Breast (3)                        | Lobular Breast Carcinoma (21)                            | 2.136       | 6.534   | 1.14E-04 | 7        | IMAGE: 769933 (2) | 15034139 | GSE3971       |
|               |              | Breast (3)                        | Invasive Ductal Breast Carcinoma (38)                    | 2.613       | 8.179   | 1.54E-05 | 7        | IMAGE: 769933 (2) | 15034139 | GSE3971       |
| Colorectal    | Hong         | Colon (12)                        | Colorectal Carcinoma (70)                                | 3.761       | 17.027  | 1.96E-18 | 1        | 212090_at         | 20143136 | GSE9348       |
|               | Gaedcke      | Rectum (65)                       | Rectal Adenocarcinoma (65)                               | 2.587       | 14.11   | 7.93E-25 | 3        | A_23_P316960      | 20725992 | GSE20842      |
|               | Skrzypczak 2 | Colon (10)                        | Colon Carcinoma (5)                                      | 2.811       | 8.939   | 5.21E-07 | 8        | 212090_at         | 20957034 | GSE20916      |
| Esophagus     | Hao          | Esophagus (11)                    | Esophageal Adenocarcinoma (2)                            | -5.61       | -11.584 | 1.64E-11 | 1        | IMAGE: 954354     | 16952561 | GSE6059       |
|               |              | Esophagus (11)                    | Barrett's Esophagus (12)                                 | -3.168      | -2.902  | 6.00E-03 | 4        | IMAGE: 954354     | 16952561 | GSE6059       |
| Gastric       | DErrico      | Gastric Mucosa (31)               | Gastric Intestinal Type Adenocarcinoma (26)              | 3.174       | 10.113  | 1.39E-13 | 1        | 212090_at         | 19081245 | GSE13911      |
|               |              | Gastric Mucosa (31)               | Gastric Mixed Adenocarcinoma (4)                         | 2.709       | 6.66    | 8.26E-04 | 9        | 212090_at         | 19081245 | GSE13911      |
|               | Chen         | Gastric Mucosa (24)               | Gastric Mixed Adenocarcinoma (8)                         | 2.244       | 4.923   | 1.80E-04 | 4        | IMAGE: 953791     | 12925757 | N/A           |
|               | Cho          | Gastric Tissue (19)               | Gastrointestinal Stromal Tumour (6)                      | 2.884       | 6.774   | 1.65E-04 | 6        | ILMN_2370872      | 21447720 | GSE13861      |
| Head and Neck | Cromer       | Uvula (4)                         | Head and Neck Squamous Cell Carcinoma (34)               | -2.009      | -6.183  | 1.90E-06 | 2        | 32505_at          | 14676830 | GSE2379       |
| Lung          | Garber       | Lung (5)                          | Squamous Cell Lung Carcinoma (12)                        | -2.398      | -4.113  | 7.31E-04 | 8        | IMAGE: 769933     | 11707590 | GSE3398       |
| Lymphoma      | Compagno     | Germinal Center B-Lymphocyte (10) | Activated B-Cell-Like Diffuse Large B-Cell Lymphoma (17) | 2.127       | 7.796   | 4.36E-09 | 5        | 212090_at         | 19412164 | GSE12195      |
|               | Piccaluga    | CD4-Positive T-Lymphocyte (5)     | Angioimmunoblastic T-Cell Lymphoma (6)                   | 2.052       | 7.02    | 4.91E-05 | 9        | 212090_at         | 17304354 | GSE6338       |
| Melanoma      | Haqq         | Skin (3)                          | Non-Neoplastic Nevus (9)                                 | 2.3         | 6.789   | 2.80E-05 | 3        | AA455271          | 15833814 | N/A           |
|               | Talantov     | Skin (7)                          | Cutaneous Melanoma (45)                                  | 3.423       | 10.429  | 2.14E-06 | 5        | 212090_at         | 16243793 | GSE3189       |
| Ovarian       | Bonome       | Ovarian Surface Epithelium (10)   | Ovarian Carcinoma (185)                                  | 4.354       | 25.6    | 4.85E-21 | 1        | 212090_at         | 18593951 | GSE26712      |
| Prostate      | Tomlins      | Prostate Gland (23)               | Prostate Carcinoma (30)                                  | 3.251       | 5.296   | 1.32E-06 | 2        | IMAGE: 810038     | 17173048 | GSE6099       |
|               |              | Prostate Gland (23)               | Prostatic Intraepithelial Neoplasia (13)                 | 3.265       | 4.476   | 7.51E-05 | 3        | IMAGE: 810038     | 17173048 | GSE6099       |

23

24 **Supplementary Table 2.** Changes in GRINA expression at the transcriptional level between different types of cancer and normal tissues (TCGA  
 25 Database).

| Order | Cancer type                                  | # of normal samples | # of cancer samples | GRINA expression in cancer (High/Low) | p-value (Welch's t-test) |
|-------|----------------------------------------------|---------------------|---------------------|---------------------------------------|--------------------------|
| 1     | Bladder urothelial carcinoma (BLCA)          | 19                  | 408                 | High                                  | 5.4E-06                  |
| 2     | Breast invasive carcinoma (BRCA)             | 114                 | 1097                | High                                  | 4.6E-38                  |
| 3     | Cervical squamous cell carcinoma (CESC)      | 3                   | 305                 | Low                                   | 0.3771                   |
| 4     | Cholangiocarcinoma (CHOL)                    | 9                   | 36                  | Low                                   | 3.05E-06                 |
| 5     | Colon adenocarcinoma (COAD)                  | 4                   | 286                 | High                                  | 2.25E-22                 |
| 6     | Esophageal carcinoma (ESCA)                  | 11                  | 184                 | High                                  | 4.81E-06                 |
| 7     | Glioblastoma multiforme (GBM)                | 5                   | 156                 | Low                                   | 0.289002                 |
| 8     | Head and neck squamous cell carcinoma (HNSC) | 44                  | 520                 | High                                  | 1.52E-10                 |
| 9     | Kidney chromophobe (KICH)                    | 25                  | 67                  | High                                  | 2.42E-09                 |
| 8     | Kidney renal clear cell carcinoma (KIRC)     | 72                  | 533                 | High                                  | 1.28E-12                 |
| 11    | Kidney renal papillary cell carcinoma (KIRP) | 32                  | 290                 | Low                                   | 0.386717                 |
| 12    | Liver hepatocellular carcinoma (LIHC)        | 50                  | 371                 | High                                  | 4.65E-10                 |
| 13    | Lung adenocarcinoma (LUAD)                   | 59                  | 515                 | High                                  | 0.278277                 |
| 14    | Lung squamous cell carcinoma (LUSC)          | 52                  | 503                 | Low                                   | 0.014681                 |
| 15    | Pancreatic adenocarcinoma (PAAD)             | 4                   | 178                 | Low                                   | 0.432492                 |
| 16    | Prostate adenocarcinoma (PRAD)               | 52                  | 497                 | High                                  | 5.12E-10                 |
| 17    | Pheochromocytoma and Paraganglioma (PCPG)    | 3                   | 179                 | Low                                   | 0.240684                 |
| 18    | Rectum adenocarcinoma (READ)                 | 10                  | 166                 | High                                  | 7.18E-14                 |

|           |                                             |    |     |      |         |
|-----------|---------------------------------------------|----|-----|------|---------|
| <b>19</b> | Sarcoma (SARC)                              | 2  | 260 | Low  | N/A     |
| <b>20</b> | Skin Cutaneous Melanoma (SKCM)              | 1  | 472 | Low  | N/A     |
| <b>21</b> | Thyroid carcinoma (THCA)                    | 59 | 505 | High | 9.3E-15 |
| <b>22</b> | Thymoma (THYM)                              | 2  | 120 | High | N/A     |
| <b>23</b> | Stomach adenocarcinoma (STAD)               | 34 | 415 | High | 7E-09   |
| <b>24</b> | Uterine corpus endometrial carcinoma (UCEC) | 35 | 546 | High | 6.1E-12 |

26

27

28

29

30

31

32

33

34

35

36

37 **Supplementary Table 3.** Transcription factors regulating genes positively and negatively co-expressed with GRINA identified using  
 38 Expression2Kinases (X2K).

| Rank                                                                 | Transcription factor | Hypergeometric P-value | Z-score | Combined score | # of Enriched targets | Enriched targets                                                                                                                                                                                       |
|----------------------------------------------------------------------|----------------------|------------------------|---------|----------------|-----------------------|--------------------------------------------------------------------------------------------------------------------------------------------------------------------------------------------------------|
| <b>Transcription factors as positive co-expressed genes of GRINA</b> |                      |                        |         |                |                       |                                                                                                                                                                                                        |
| 1                                                                    | GABPA                | 2.16E-08               | 0       | 0              | 31                    | ERGIC3 ALG3 FBXL6 TSNARE1 SHARPIN C8ORF33 C8ORF82 NFS1 ZNF7 CPSF1 C20ORF24 EIF6 NSUN5 ZNF696 NDUFB9 ZNF707 COMMD5 EXOSC4 SCAND1 SLC52A2 DDX56 RPL8 ACOT8 GLI4 GPS1 MAF1 ZFP41 ZNF517 PUF60 ADRM1 ROMO1 |
| 2                                                                    | PML                  | 8.28E-08               | 0       | 0              | 26                    | DGAT1 FBXL6 SHARPIN EEF1D SCRIB VPS28 ZC3H3 ZNF7 CHRAC1 CPSF1 DYNLRB1 MFSD3 NSUN5 NDUFB9 EXOSC4 SCAND1 CYC1 SLC52A2 PDPDF C16ORF13 RPL8 TIGD5 MAF1 STIP1 PUF60 ADRM1                                   |
| 3                                                                    | SP2                  | 0.00005086             | 0       | 0              | 16                    | EIF6 ZNF696 RHPN1-AS1 ZNF707 COMMD5 SHARPIN ATP6AP1 ACOT8 GLI4 MAF1 STIP1 ZNF517 ADRM1 ZNF7 DYNLRB1 CYHR1                                                                                              |
| 4                                                                    | MAX                  | 0.001836               | 0       | 0              | 21                    | G6PC3 ALG3 BOP1 EEF1D ADCK5 CHRAC1 CPSF1 PYCRL MFSD3 PIGU NSUN5 NDUFB9 HSF1 SCAND1 DDX56 CLCN7 TIGD5 PUF60 PTDSS2 PTDSS1 SPNS1                                                                         |
| 5                                                                    | HNF4A                | 0.006105               | 0       | 0              | 14                    | EIF6 NSUN5 ZNF696 DGAT1 TMEM150A SCAND1 SHARPIN DDX56 VPS28 MAF1 SLC39A4 C8ORF59 MAFG-AS1 CHRAC1 DGAT1 G6PC3 EEF1D C8ORF33 ADCK5 CHRAC1 CPSF1                                                          |
| 6                                                                    | TAF1                 | 0.009444               | 0       | 0              | 27                    | NSUN5 SCAND1 CYC1 STIP1 ZNF517 PUF60 SPNS1 ALG3 SHARPIN TRAPPC9 PIGU PSMA7 NDUFB9 EXOSC4 TIMM17B RPL8 ACOT8 TIGD5 MAF1 PTDSS1                                                                          |
| 7                                                                    | BCLAF1               | 0.01318                | 0       | 0              | 10                    | EXOSC4 SCAND1 SHARPIN SCRIB GLI4 MAF1 C8ORF33 ZNF7 CPSF1 MFSD3                                                                                                                                         |
| 8                                                                    | NRF1                 | 0.01618                | 0       | 0              | 17                    | ERGIC3 EEF1D VPS28 MAFG-AS1 TRAPPC9 ZC3H3 ADCK5 CPSF1 DYNLRB1 C20ORF24 NELFCD GPAA1 SCAND1 CCDC167 DDX56 TIGD5 ATP6V1F                                                                                 |

|    |       |         |   |   |    |                                                                                                                                                                                |
|----|-------|---------|---|---|----|--------------------------------------------------------------------------------------------------------------------------------------------------------------------------------|
| 9  | FLI1  | 0.02038 | 0 | 0 | 8  | SCRIB NSUN5 C8ORF82 NDUFB9 FBXL6 EXOSC4 SLC52A2<br>DDX56                                                                                                                       |
| 10 | BRCA1 | 0.02048 | 0 | 0 | 25 | G6PC3 EEF1D ZC3H3 ADCK5 CHRAC1 CPSF1 MFSD3 ZNF696<br>SCAND1 BCAP31 CYC1 C16ORF13 PUF60 SPNS1 ATP6V1F<br>CYHR1 C20ORF24 PSMA7 THEM6 NDUFB9 EXOSC4<br>TIMM17B DDX56 TIGD5 PTDSS1 |

**Transcription factors as negative co-expressed genes of GRINA**

|    |       |         |   |   |   |                                       |
|----|-------|---------|---|---|---|---------------------------------------|
| 1  | ERG   | 0.01343 | 0 | 0 | 2 | CEP192 RANBP2                         |
| 2  | STAT3 | 0.01974 | 0 | 0 | 2 | CHD9 AKAP13                           |
| 3  | PPARG | 0.02628 | 0 | 0 | 3 | RANBP2 CHD9 MCPH1                     |
| 4  | USF2  | 0.02722 | 0 | 0 | 4 | PCM1 KLHL28 BTBD7 RANBP2              |
| 5  | SIX5  | 0.04059 | 0 | 0 | 4 | ZNF45 WRN PCM1 KLHL28                 |
| 6  | NFYA  | 0.04617 | 0 | 0 | 6 | WRN CEP192 AKAP13 TNRC6B DICER1 MIER1 |
| 7  | EGR1  | 0.0562  | 0 | 0 | 2 | PCM1 TNRC6B                           |
| 8  | STAT3 | 0.05636 | 0 | 0 | 3 | APAF1 TNRC6B KLHL28                   |
| 9  | TP53  | 0.05747 | 0 | 0 | 2 | CHD9 APAF1                            |
| 10 | GATA2 | 0.0656  | 0 | 0 | 3 | CHD9 TNRC6B MCPH1                     |

39

40

41

42

43

44

45

46

47 **Supplementary Table 4.** Protein kinases likely acting on genes positively- and negatively co-expressed with GRINA that are responsible for  
 48 phosphorylation of PPI in various cancers.

| Rank                                                                            | Protein kinase | Hypergeometric P-value | Z-score | Combined score | # of Enriched Substrates | Enriched Substrates                                                                                                                                                                                                                                                                                                              |
|---------------------------------------------------------------------------------|----------------|------------------------|---------|----------------|--------------------------|----------------------------------------------------------------------------------------------------------------------------------------------------------------------------------------------------------------------------------------------------------------------------------------------------------------------------------|
| <b>Protein kinases associated with genes positively co-expressed with GRINA</b> |                |                        |         |                |                          |                                                                                                                                                                                                                                                                                                                                  |
| 1                                                                               | CSNK2A1        | 1.45E-25               | 0       | 0              | 53                       | ATF1 CSNK2A1 PPARGC1A JUN EZH2 FOS SIRT1<br>STAT1 YY1 PIAS1 MSH2 MAX FOXO1 SUMO1 SUMO2<br>ARNT SRF E2F1 CSNK2B SMARCA4 BRCA1 NCOA2<br>RELA UBE3A CCND1 SFPQ AURKA RB1 MYC MED1<br>HIF1A TERF2 NCOR2 BCLAF1 CDKN2A CDK2 BCL2<br>CDK1 HDAC2 HDAC3 PML RAD51 CHEK2 GABPA<br>PRMT1 SUZ12 SMAD4 SMAD3 TOPBP1 H2AFX RBL2<br>RBL1 MAPK1 |
| 2                                                                               | CDK1           | 1.09E-19               | 0       | 0              | 49                       | CSNK2A1 PPARGC1A JUN EZH2 FOS SIRT1 STAT1<br>CCNT1 MSH2 NRF1 FOXO1 SP2 SP1 E2F1 E2F4 CSNK2B<br>SMARCA4 BRCA1 HNF4A NCOA2 RELA UBE3A CCND1<br>SFPQ AURKA TAF1 RB1 MYC MED1 HIF1A NCOR2<br>BCLAF1 CDKN2A CDK2 BCL2 CDK1 HDAC2 PML<br>RAD51 CHEK2 SUZ12 SMAD4 SMAD3 TOPBP1 H2AFX<br>RBL2 RBL1 MAPK1 MAPK3                           |
| 3                                                                               | MAPK14         | 7.22E-16               | 0       | 0              | 35                       | PPARGC1A JUN EZH2 FOS STAT1 YY1 MSH2 FOXO1<br>SP1 E2F1 CSNK2B SMARCA4 BRCA1 HNF4A NCOA2<br>RELA CCND1 AURKA RB1 MYC HIF1A TERF2 NCOR2<br>BCLAF1 CDKN2A CDK2 BCL2 CDK1 RAD51 SUZ12<br>SMAD4 SMAD3 TOPBP1 RBL2 MAPK1                                                                                                               |
| 4                                                                               | CDK2           | 3.23E-15               | 0       | 0              | 52                       | JUN MED17 FOS MSH2 SP2 SP1 E2F1 E2F4 TP63<br>CSNK2B SMARCA4 UBE3A RNF4 TERF2 NCOR2<br>CDKN2A BCL2 HDAC2 PML GABPA TOPBP1 H2AFX<br>RBL2 RBL1 MAPK1 EZH2 STAT1 CCNT1 YY1 FOXO1<br>SUMO1 SUMO2 BRCA1 NCOA2 CCND1 SFPQ AURKA<br>TAF6 TAF1 RB1 MYC MED1 HIF1A BCLAF1 CDK2                                                             |

|    |          |          |   |   |    |                                                                                                                                                                                                                              |
|----|----------|----------|---|---|----|------------------------------------------------------------------------------------------------------------------------------------------------------------------------------------------------------------------------------|
|    |          |          |   |   |    | CDK1 RAD51 CHEK2 PRMT1 SUZ12 SMAD4 SMAD3                                                                                                                                                                                     |
| 5  | MAPK1    | 6.11E-15 | 0 | 0 | 30 | RB1 MYC MED1 CSNK2A1 GATA1 HIF1A JUN NR0B2<br>EZH2 FOS TERF2 NCOR2 BCLAF1 CDKN2A STAT1<br>FOXO1 SP1 CDK2 BCL2 CDK1 PML BRCA1 NCOA1<br>NCOA2 RELA CCND1 SMAD4 SMAD3 RBL2 MAPK1<br>ATF1 RB1 MYC CSNK2B JUN SMARCA4 BRCA1 NCOR2 |
| 6  | CK2ALPHA | 1.65E-14 | 0 | 0 | 21 | RELA UBE3A YY1 MAX SP1 CDK1 SUMO1 ARNT<br>HDAC2 HDAC3 SRF PML TAF1                                                                                                                                                           |
| 7  | ATM      | 2.83E-13 | 0 | 0 | 20 | RB1 CHEK2 TP63 MED1 HIF1A SMARCA4 EZH2 BRCA1<br>TERF2 BCLAF1 MSH2 SP1 CDK2 CDK1 TOPBP1 H2AFX<br>RBL2 RBL1 E2F1 RAD51                                                                                                         |
| 8  | CDK4     | 8.52E-12 | 0 | 0 | 15 | RB1 CCND1 MYC MAX FOXO1 JUN SMAD3 SP1 CDK2<br>BCL2 BRCA1 SUMO1 RBL2 RBL1 CDKN2A                                                                                                                                              |
| 9  | MAPK3    | 1.59E-11 | 0 | 0 | 20 | MYC MED1 GATA1 JUN NR0B2 NCOA1 NCOA2 FOS<br>STAT1 CCND1 FOXO1 SMAD4 SMAD3 SP1 CDK2 BCL2<br>CDK1 E2F4 MAPK3 PML                                                                                                               |
| 10 | ERK1     | 8.37E-11 | 0 | 0 | 15 | MYC PRKCD GATA1 HIF1A JUN SMAD4 SMAD3 SP1<br>BCL2 JAK1 FOS NCOR2 SRF RELA STAT1                                                                                                                                              |

**Protein kinase associated with genes negatively co-expressed with GRINA**

|   |         |          |   |   |    |                                                                                                                                                                                                                                                                                                                                                                                                                                                                                                                                                                                                              |
|---|---------|----------|---|---|----|--------------------------------------------------------------------------------------------------------------------------------------------------------------------------------------------------------------------------------------------------------------------------------------------------------------------------------------------------------------------------------------------------------------------------------------------------------------------------------------------------------------------------------------------------------------------------------------------------------------|
| 1 | CSNK2A1 | 4.26E-24 | 0 | 0 | 58 | SPI1 DAXX CSNK2A1 PPARGC1A JUN EZH2 SIRT1<br>PPARG EGFR STAT1 STAT3 APEX1 PIAS1 PIN1 PTEN<br>HSP90AA1 SRSF1 TRIM28 TP53 EGR1 XRCC6 SMARCA4<br>NCOA3 RELA CCND1 TFAP2A VDR HMGA1 BHLHE40<br>YWHAG CCNA2 RB1 MED1 HIF1A SNAI1 CDKN1A<br>NCOR2 NCOR1 CDKN2A USP7 DNMT1 COPS5 CDK5<br>CDK2 CDK1 SIN3A CEBPB HDAC2 HDAC3 MTOR PML<br>XPO1 KDM1A HSPA8 SMAD3 HSPA4 MAPK9 MAPK1<br>RB1 MED1 CSNK2A1 HIF1A LYN JUN EIF2AK2 NR0B2<br>SNAI1 EZH2 CDKN1A NCOR2 PPARG EGFR CDKN2A<br>STAT1 STAT3 ERG SP1 CDK2 CDK1 PTEN CEBPB PML<br>RUNX2 TP53 EGR1 PTK2 NCOA1 RELA NR3C1 ETS2<br>CCND1 SMAD2 SMAD1 SMAD3 HMGA1 BHLHE40 |
| 2 | MAPK1   | 5.62E-21 | 0 | 0 | 40 |                                                                                                                                                                                                                                                                                                                                                                                                                                                                                                                                                                                                              |

MAPK8 MAPK1

|   |        |          |   |   |    |                                                                                                                                                                                                                                                                                                                                                                                                                                                                                                                                                                                                                                                                                                                                                                                                                                                                                                                                                                                                                                                                                                                                                                                                                                                                                                                                                                                                                                                                                                                                                                                                                                                                                                                                                                                                                                                                                                                                                                                                                                                                             |
|---|--------|----------|---|---|----|-----------------------------------------------------------------------------------------------------------------------------------------------------------------------------------------------------------------------------------------------------------------------------------------------------------------------------------------------------------------------------------------------------------------------------------------------------------------------------------------------------------------------------------------------------------------------------------------------------------------------------------------------------------------------------------------------------------------------------------------------------------------------------------------------------------------------------------------------------------------------------------------------------------------------------------------------------------------------------------------------------------------------------------------------------------------------------------------------------------------------------------------------------------------------------------------------------------------------------------------------------------------------------------------------------------------------------------------------------------------------------------------------------------------------------------------------------------------------------------------------------------------------------------------------------------------------------------------------------------------------------------------------------------------------------------------------------------------------------------------------------------------------------------------------------------------------------------------------------------------------------------------------------------------------------------------------------------------------------------------------------------------------------------------------------------------------------|
| 3 | MAPK14 | 2.42E-18 | 0 | 0 | 42 | <p>PPARGC1A JUN EIF2AK2 EZH2 EGFR STAT1 STAT3<br/>                     APEX1 SP1 PTEN HSP90AA1 SRSF1 TP53 EGR1<br/>                     SMARCA4 NCOA3 RELA NR3C1 CCND1 HMGA1<br/>                     BHLHE40 CCNA2 RB1 HIF1A CDKN1A NCOR2 NCOR1<br/>                     CDKN2A DNMT1 CDK5 CDK2 CDK1 SIN3A CEBPB<br/>                     KAT5 RUNX2 XPO1 HSPA8 SMAD3 MAPK8 MUC1<br/>                     MAPK1<br/>                     CSNK2A1 GATA2 PPARGC1A LYN JUN EZH2 SIRT1<br/>                     EGFR STAT1 STAT3 APEX1 NFKB1 SP1 PTEN<br/>                     HSP90AA1 SRSF1 TRIM28 TP53 EGR1 SMARCA4<br/>                     NCOA3 RELA CCND1 HMGA1 BHLHE40 YWHAG<br/>                     CCNA2 TAF1 RB1 MED1 HIF1A CDKN1A NCOR2<br/>                     NCOR1 CDKN2A USP7 DNMT1 CDK2 CDK1 SIN3A<br/>                     CEBPB HDAC2 MTOR PML KAT5 RUNX2 XPO1 NFYA<br/>                     KDM1A SMAD3 MAPK8 MAPK1<br/>                     ETS2 KAT5 PRKCD RUNX2 TP53 HIF1A LYN SMAD2<br/>                     SMAD1 JUN SMAD3 NFKB1 PTK2 SP1 NCOR2 CEBPB<br/>                     EGFR RELA MAPK8 STAT1 STAT3 MTOR<br/>                     RB1 ETS2 RUNX2 TP53 SMAD2 SMAD1 JUN SMAD3<br/>                     NFKB1 PTK2 SP1 NCOA1 NCOA3 NCOR2 PPARG CEBPB<br/>                     EGFR RELA STAT1 STAT3 MTOR<br/>                     GATA2 JUN PPARG EGFR PIAS1 SP1 PTEN TP63 TP53<br/>                     EGR1 PTK2 SMARCA4 RELA NR3C1 BHLHE40 USF2<br/>                     SNAI1 CDKN1A NCOR2 NCOR1 CDKN2A CEBPB MTOR<br/>                     PML KAT5 KDM1A MAPK8 MUC1 MAPK1 DAXX LYN<br/>                     EZH2 SIRT1 STAT1 STAT3 NFKB1 NFKB2 NCOA3<br/>                     CCND1 HMGA1 CCNA2 TAF1 RB1 MED1 HIF1A DNMT1<br/>                     CDK2 CDK1 SIN3A KLF5 RUNX2 SMAD2 HSPA8<br/>                     SMAD1 SMAD3<br/>                     MED1 RUNX2 TP53 EGR1 JUN NR0B2 PTK2 CDKN1A<br/>                     NCOA1 PPARG EGFR STAT1 STAT3 NR3C1 ETS2<br/>                     CCND1 SMAD2 SMAD3 SP1 BHLHE40 CDK2 CDK1</p> |
| 4 | CDK1   | 5.10E-17 | 0 | 0 | 52 | <p>ETS2 KAT5 PRKCD RUNX2 TP53 HIF1A LYN SMAD2<br/>                     SMAD1 JUN SMAD3 NFKB1 PTK2 SP1 NCOR2 CEBPB<br/>                     EGFR RELA MAPK8 STAT1 STAT3 MTOR<br/>                     RB1 ETS2 RUNX2 TP53 SMAD2 SMAD1 JUN SMAD3<br/>                     NFKB1 PTK2 SP1 NCOA1 NCOA3 NCOR2 PPARG CEBPB<br/>                     EGFR RELA STAT1 STAT3 MTOR<br/>                     GATA2 JUN PPARG EGFR PIAS1 SP1 PTEN TP63 TP53<br/>                     EGR1 PTK2 SMARCA4 RELA NR3C1 BHLHE40 USF2<br/>                     SNAI1 CDKN1A NCOR2 NCOR1 CDKN2A CEBPB MTOR<br/>                     PML KAT5 KDM1A MAPK8 MUC1 MAPK1 DAXX LYN<br/>                     EZH2 SIRT1 STAT1 STAT3 NFKB1 NFKB2 NCOA3<br/>                     CCND1 HMGA1 CCNA2 TAF1 RB1 MED1 HIF1A DNMT1<br/>                     CDK2 CDK1 SIN3A KLF5 RUNX2 SMAD2 HSPA8<br/>                     SMAD1 SMAD3<br/>                     MED1 RUNX2 TP53 EGR1 JUN NR0B2 PTK2 CDKN1A<br/>                     NCOA1 PPARG EGFR STAT1 STAT3 NR3C1 ETS2<br/>                     CCND1 SMAD2 SMAD3 SP1 BHLHE40 CDK2 CDK1</p>                                                                                                                                                                                                                                                                                                                                                                                                                                                                                                                                                                                                                                                                                                                                                                                                                                                                                                                                                              |
| 5 | ERK1   | 8.61E-17 | 0 | 0 | 22 | <p>ETS2 KAT5 PRKCD RUNX2 TP53 HIF1A LYN SMAD2<br/>                     SMAD1 JUN SMAD3 NFKB1 PTK2 SP1 NCOR2 CEBPB<br/>                     EGFR RELA MAPK8 STAT1 STAT3 MTOR<br/>                     RB1 ETS2 RUNX2 TP53 SMAD2 SMAD1 JUN SMAD3<br/>                     NFKB1 PTK2 SP1 NCOA1 NCOA3 NCOR2 PPARG CEBPB<br/>                     EGFR RELA STAT1 STAT3 MTOR<br/>                     GATA2 JUN PPARG EGFR PIAS1 SP1 PTEN TP63 TP53<br/>                     EGR1 PTK2 SMARCA4 RELA NR3C1 BHLHE40 USF2<br/>                     SNAI1 CDKN1A NCOR2 NCOR1 CDKN2A CEBPB MTOR<br/>                     PML KAT5 KDM1A MAPK8 MUC1 MAPK1 DAXX LYN<br/>                     EZH2 SIRT1 STAT1 STAT3 NFKB1 NFKB2 NCOA3<br/>                     CCND1 HMGA1 CCNA2 TAF1 RB1 MED1 HIF1A DNMT1<br/>                     CDK2 CDK1 SIN3A KLF5 RUNX2 SMAD2 HSPA8<br/>                     SMAD1 SMAD3<br/>                     MED1 RUNX2 TP53 EGR1 JUN NR0B2 PTK2 CDKN1A<br/>                     NCOA1 PPARG EGFR STAT1 STAT3 NR3C1 ETS2<br/>                     CCND1 SMAD2 SMAD3 SP1 BHLHE40 CDK2 CDK1</p>                                                                                                                                                                                                                                                                                                                                                                                                                                                                                                                                                                                                                                                                                                                                                                                                                                                                                                                                                              |
| 6 | ERK2   | 4.44E-16 | 0 | 0 | 21 | <p>ETS2 KAT5 PRKCD RUNX2 TP53 HIF1A LYN SMAD2<br/>                     SMAD1 JUN SMAD3 NFKB1 PTK2 SP1 NCOR2 CEBPB<br/>                     EGFR RELA MAPK8 STAT1 STAT3 MTOR<br/>                     RB1 ETS2 RUNX2 TP53 SMAD2 SMAD1 JUN SMAD3<br/>                     NFKB1 PTK2 SP1 NCOA1 NCOA3 NCOR2 PPARG CEBPB<br/>                     EGFR RELA STAT1 STAT3 MTOR<br/>                     GATA2 JUN PPARG EGFR PIAS1 SP1 PTEN TP63 TP53<br/>                     EGR1 PTK2 SMARCA4 RELA NR3C1 BHLHE40 USF2<br/>                     SNAI1 CDKN1A NCOR2 NCOR1 CDKN2A CEBPB MTOR<br/>                     PML KAT5 KDM1A MAPK8 MUC1 MAPK1 DAXX LYN<br/>                     EZH2 SIRT1 STAT1 STAT3 NFKB1 NFKB2 NCOA3<br/>                     CCND1 HMGA1 CCNA2 TAF1 RB1 MED1 HIF1A DNMT1<br/>                     CDK2 CDK1 SIN3A KLF5 RUNX2 SMAD2 HSPA8<br/>                     SMAD1 SMAD3<br/>                     MED1 RUNX2 TP53 EGR1 JUN NR0B2 PTK2 CDKN1A<br/>                     NCOA1 PPARG EGFR STAT1 STAT3 NR3C1 ETS2<br/>                     CCND1 SMAD2 SMAD3 SP1 BHLHE40 CDK2 CDK1</p>                                                                                                                                                                                                                                                                                                                                                                                                                                                                                                                                                                                                                                                                                                                                                                                                                                                                                                                                                              |
| 7 | GSK3B  | 3.27E-15 | 0 | 0 | 55 | <p>ETS2 KAT5 PRKCD RUNX2 TP53 HIF1A LYN SMAD2<br/>                     SMAD1 JUN SMAD3 NFKB1 PTK2 SP1 NCOR2 CEBPB<br/>                     EGFR RELA MAPK8 STAT1 STAT3 MTOR<br/>                     RB1 ETS2 RUNX2 TP53 SMAD2 SMAD1 JUN SMAD3<br/>                     NFKB1 PTK2 SP1 NCOA1 NCOA3 NCOR2 PPARG CEBPB<br/>                     EGFR RELA STAT1 STAT3 MTOR<br/>                     GATA2 JUN PPARG EGFR PIAS1 SP1 PTEN TP63 TP53<br/>                     EGR1 PTK2 SMARCA4 RELA NR3C1 BHLHE40 USF2<br/>                     SNAI1 CDKN1A NCOR2 NCOR1 CDKN2A CEBPB MTOR<br/>                     PML KAT5 KDM1A MAPK8 MUC1 MAPK1 DAXX LYN<br/>                     EZH2 SIRT1 STAT1 STAT3 NFKB1 NFKB2 NCOA3<br/>                     CCND1 HMGA1 CCNA2 TAF1 RB1 MED1 HIF1A DNMT1<br/>                     CDK2 CDK1 SIN3A KLF5 RUNX2 SMAD2 HSPA8<br/>                     SMAD1 SMAD3<br/>                     MED1 RUNX2 TP53 EGR1 JUN NR0B2 PTK2 CDKN1A<br/>                     NCOA1 PPARG EGFR STAT1 STAT3 NR3C1 ETS2<br/>                     CCND1 SMAD2 SMAD3 SP1 BHLHE40 CDK2 CDK1</p>                                                                                                                                                                                                                                                                                                                                                                                                                                                                                                                                                                                                                                                                                                                                                                                                                                                                                                                                                              |
| 8 | MAPK3  | 3.55E-15 | 0 | 0 | 26 | <p>ETS2 KAT5 PRKCD RUNX2 TP53 HIF1A LYN SMAD2<br/>                     SMAD1 JUN SMAD3 NFKB1 PTK2 SP1 NCOR2 CEBPB<br/>                     EGFR RELA MAPK8 STAT1 STAT3 MTOR<br/>                     RB1 ETS2 RUNX2 TP53 SMAD2 SMAD1 JUN SMAD3<br/>                     NFKB1 PTK2 SP1 NCOA1 NCOA3 NCOR2 PPARG CEBPB<br/>                     EGFR RELA STAT1 STAT3 MTOR<br/>                     GATA2 JUN PPARG EGFR PIAS1 SP1 PTEN TP63 TP53<br/>                     EGR1 PTK2 SMARCA4 RELA NR3C1 BHLHE40 USF2<br/>                     SNAI1 CDKN1A NCOR2 NCOR1 CDKN2A CEBPB MTOR<br/>                     PML KAT5 KDM1A MAPK8 MUC1 MAPK1 DAXX LYN<br/>                     EZH2 SIRT1 STAT1 STAT3 NFKB1 NFKB2 NCOA3<br/>                     CCND1 HMGA1 CCNA2 TAF1 RB1 MED1 HIF1A DNMT1<br/>                     CDK2 CDK1 SIN3A KLF5 RUNX2 SMAD2 HSPA8<br/>                     SMAD1 SMAD3<br/>                     MED1 RUNX2 TP53 EGR1 JUN NR0B2 PTK2 CDKN1A<br/>                     NCOA1 PPARG EGFR STAT1 STAT3 NR3C1 ETS2<br/>                     CCND1 SMAD2 SMAD3 SP1 BHLHE40 CDK2 CDK1</p>                                                                                                                                                                                                                                                                                                                                                                                                                                                                                                                                                                                                                                                                                                                                                                                                                                                                                                                                                              |



|    |       |          |   |   |    |                                                                                                                                                                        |
|----|-------|----------|---|---|----|------------------------------------------------------------------------------------------------------------------------------------------------------------------------|
| 9  | MAPK8 | 6.73E-15 | 0 | 0 | 23 | PTEN CEBPB MAPK8 PML<br>RUNX2 TP53 EGR1 JUN CDKN1A NCOA3 SIRT1 PPARG<br>EGFR STAT6 CDKN2A STAT1 STAT3 NR3C1 CCND1<br>TFAP2A HMGA1 SP1 BHLHE40 CDK1 PTEN SIN3A<br>MAPK1 |
| 10 | HIPK2 | 1.29E-13 | 0 | 0 | 18 | TRIM28 TP63 TP53 HIF1A SMAD2 SMAD1 XRCC6<br>SMAD3 HMGA1 NFKB1 IKBKB SIN3A SIRT1 NCOR1<br>CEBPB RELA MAPK8 PML                                                          |

---

49 **Supplementary Figure 1.** Agarose gel picture of GRINA and GAPDH. Numbers indicate the  
50 cell lines added in Figure 2. Arrows indicate the size of PCR product.

51 **Supplementary Figure 2.** *GRINA* mRNA expression analysis in different cancer types (TCGA  
52 database). *GRINA* expression levels from data in the Cancer Genome Atlas (TCGA) database.  
53 Box plots showing *GRINA* mRNA levels in various tumours and corresponding normal tissues  
54 derived from data in TCGA database through ULCAN. (Abbreviations: BLCA-bladder urothelial  
55 carcinoma; CESC-cervical squamous cell carcinoma and endocervical adenocarcinoma; CHOL-  
56 cholangial carcinoma; ESCA-oesophageal carcinoma; GBM-glioblastoma multiforme; HNSC-  
57 head and neck squamous cell carcinoma; KIRC-kidney renal clear cell carcinoma; LIHC-liver  
58 hepatocellular carcinoma; LUAD-lung adenocarcinoma; PAAD-pancreatic adenocarcinoma;  
59 READ-rectum adenocarcinoma; SARC-sarcoma; THYM-thymoma; THCA-thyroid carcinoma;  
60 UCEC-uterine corpus endometrial carcinoma).

61 **Supplementary Figure 3.** Prognostic relevance of *GRINA* mRNA levels in various cancers  
62 based on TCGA data and SurvExpress (Available at  
63 <http://bioinformatica.mty.itesm.mx:8080/Biomatec/SurvivaX.jsp>). Survival curve analysis with a  
64 threshold of cox P-value < 0.05.

65 **Supplementary Figure 4.** GO functional annotation analysis for genes positively and negatively  
66 co-expressed with *GRINA* in breast, colon, stomach, and prostate cancer. (a-c) GO functional  
67 annotation (biological process, molecular function, and cellular component) was performed using  
68 Enrichr for 83 genes positively co-expressed with *GRINA* in breast, colon, stomach, and prostate  
69 cancer. (d-f) GO functional annotation (biological process, molecular function, and cellular  
70 component) was performed using Enrichr web for the 21 genes negatively co-expressed with  
71 *GRINA* in breast, colon, stomach, and prostate cancer.

72

73

74

75

76 **Supplementary Figure 1**

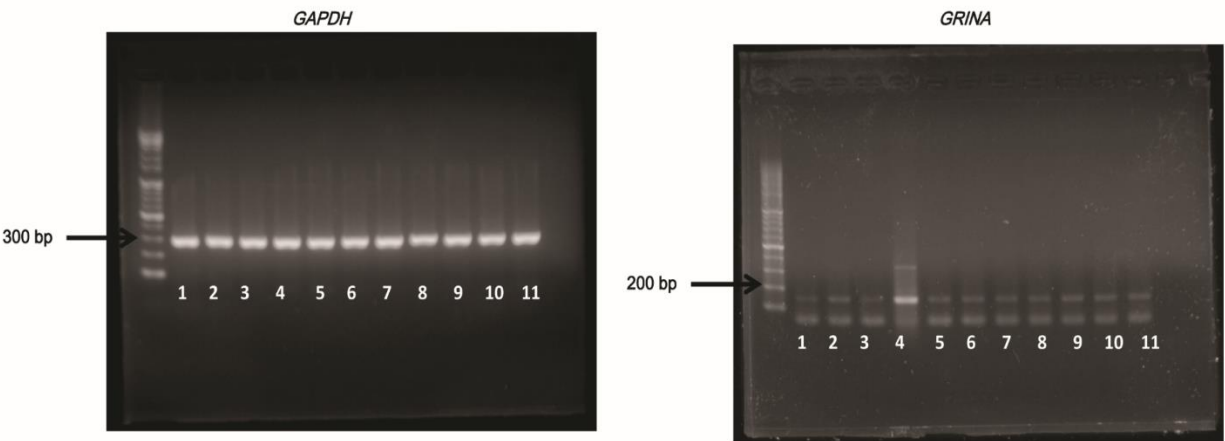

77

78

79 **Supplementary Figure 2**

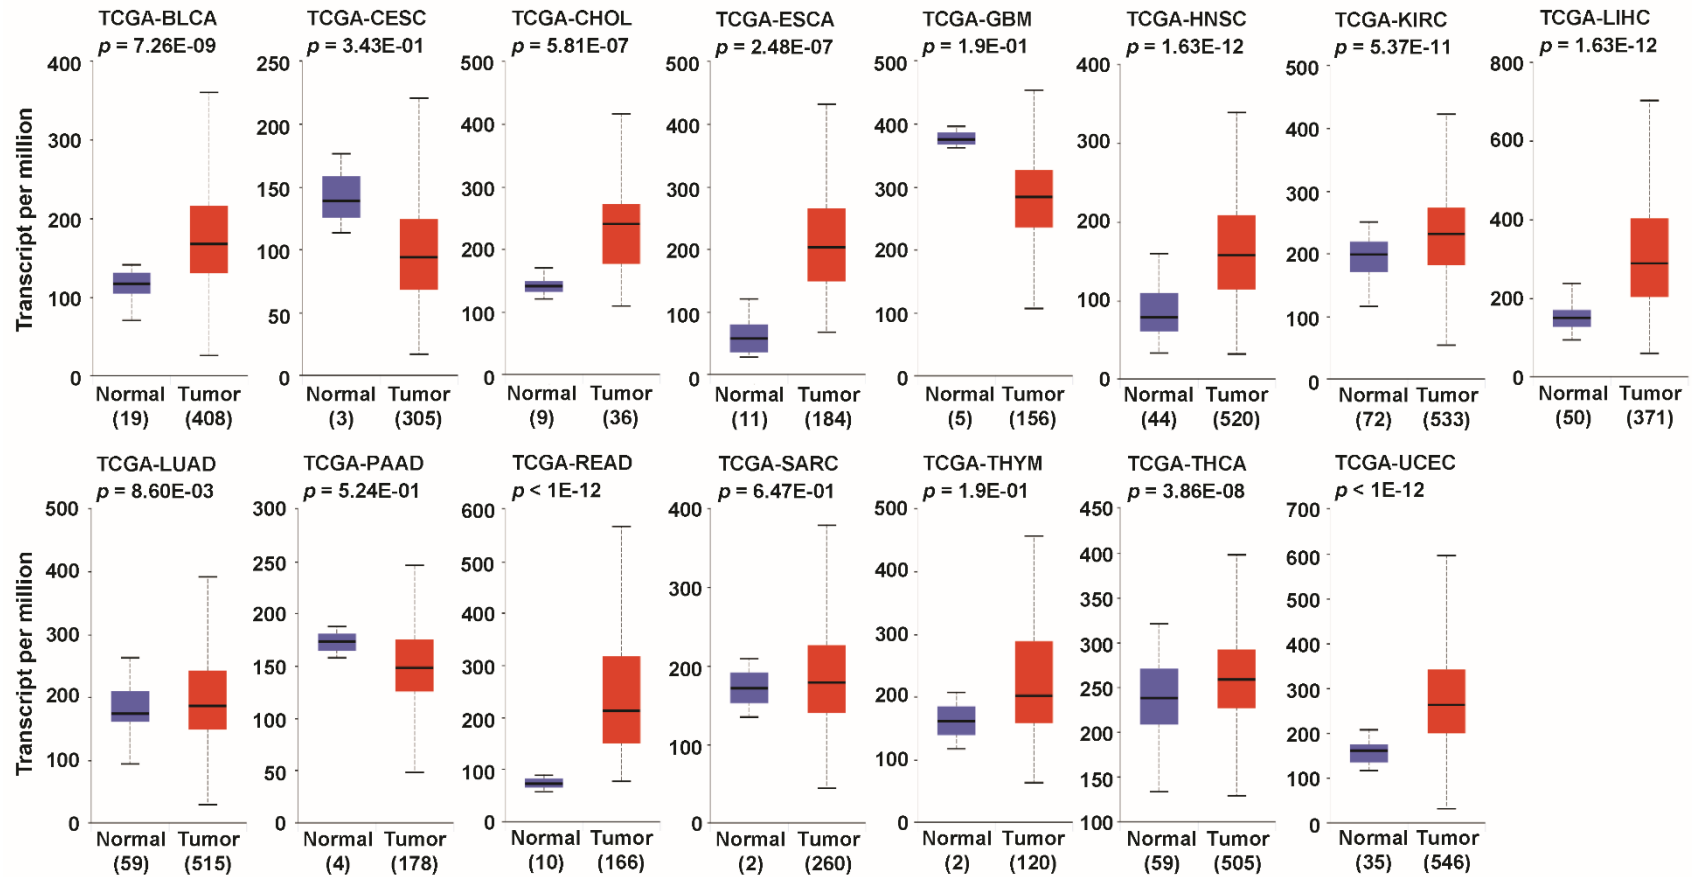

80

81

82

83

84 **Supplementary Figure 3**

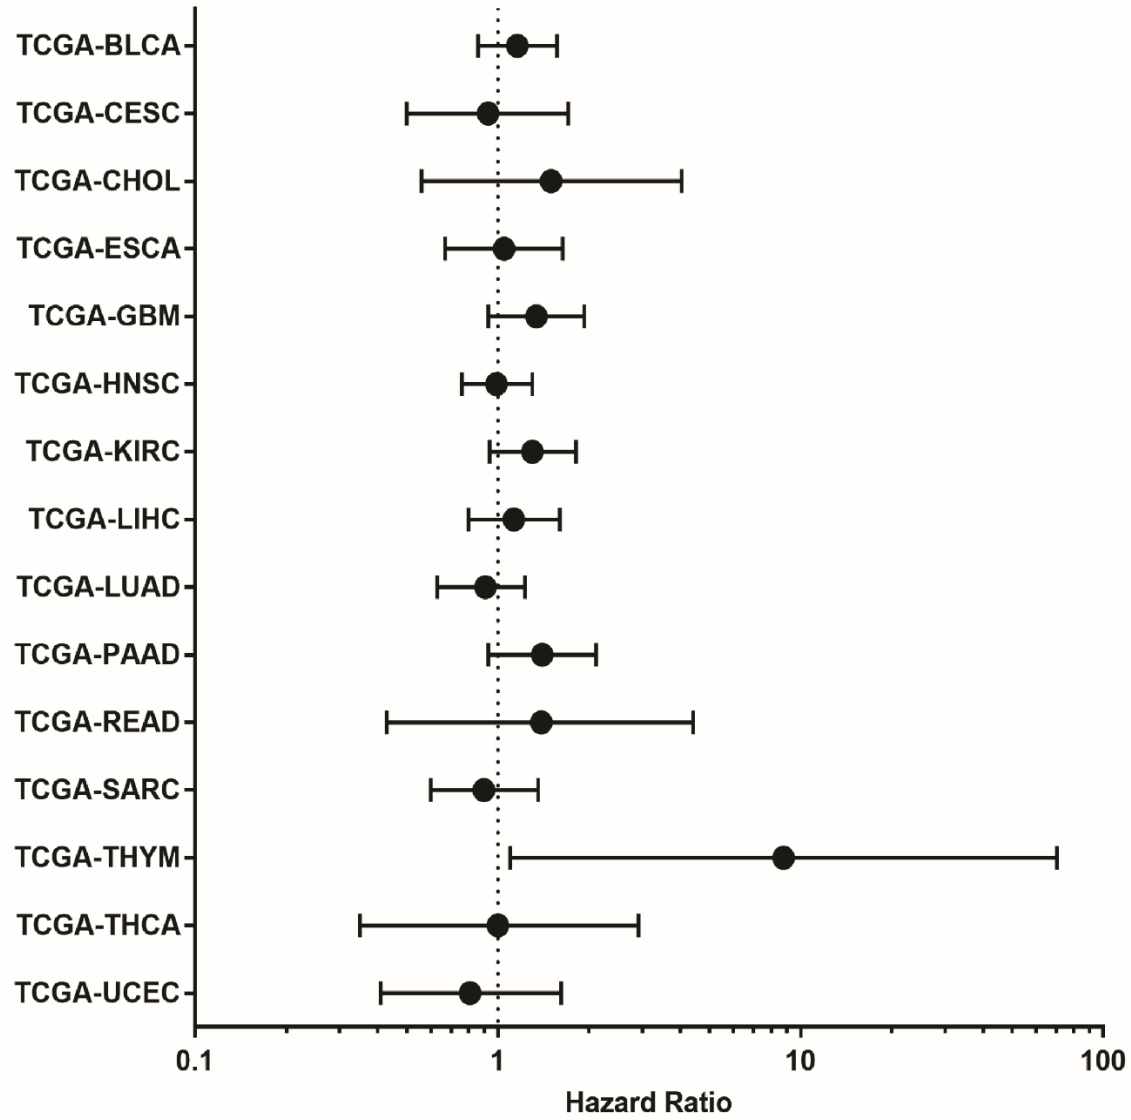

86 **Supplementary Figure 4**

**a** **GO Biological Process 2018**

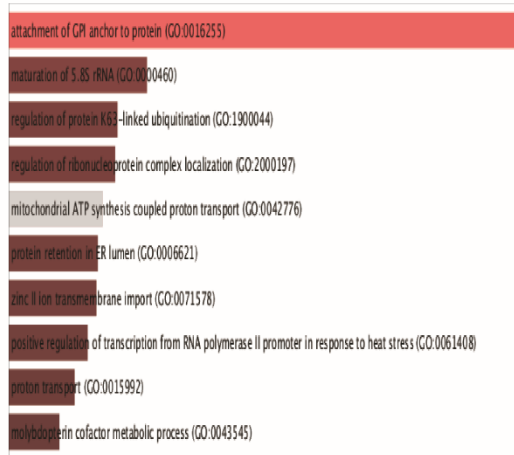

**b** **GO Molecular Function 2018**

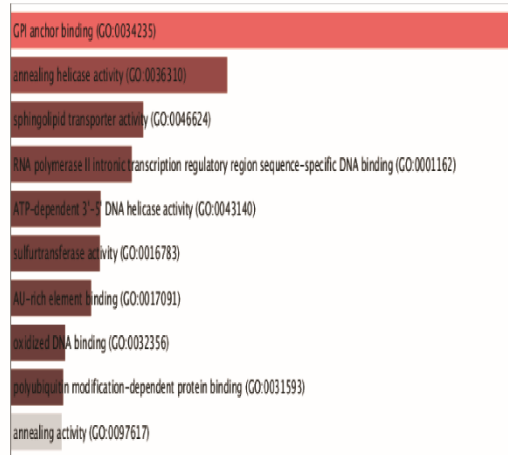

**c** **GO Cellular Component 2018**

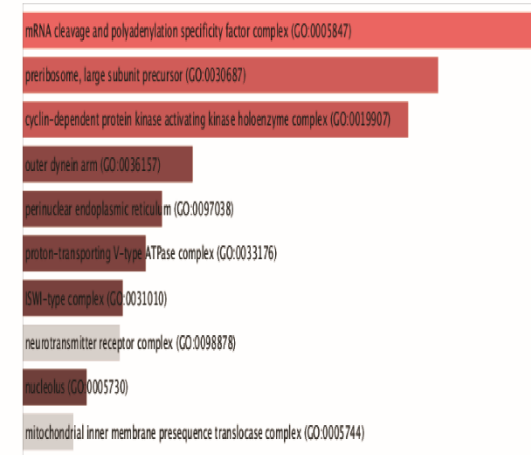

**d** **GO Biological Process 2018**

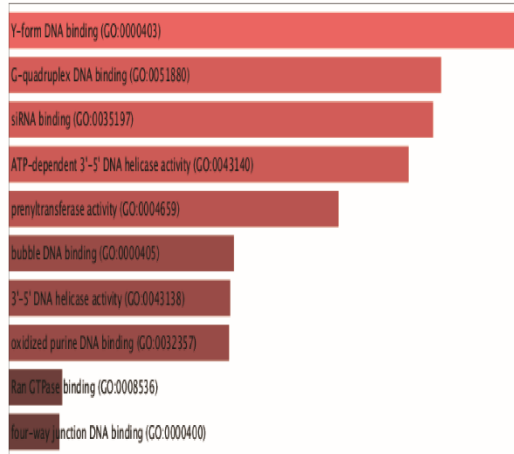

**e** **GO Molecular Function 2018**

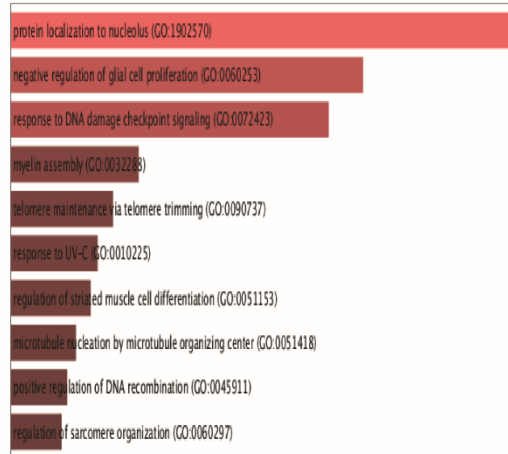

**f** **GO Cellular Component 2018**

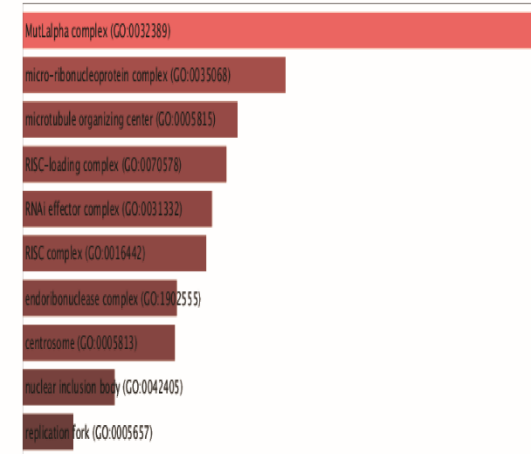

Source: http://biorxiv.org/content/10.1101/2021.05.13.444089v1.full.pdf
